# Supplementary material
Source: PubMed Central journal article supplement (PMC4959232)
Supplement: AEM.00473-16_zam999117151so1.pdf [file AEM.00473-16_zam999117151so1.pdf]

1 **Ecophysiological distinctions of haloarchaea from a hypersaline Antarctic**  
2 **lake determined using metaproteomics**

3

4 **Bernhard Tschitschko, Timothy J. Williams, Michelle A. Allen, Ling Zhong, Mark J.**  
5 **Raftery and Ricardo Cavicchioli**

6

7 **Supplemental material**

8

9 **MATERIALS AND METHODS**

10 **Sample collection from Deep Lake.** Biomass was collected from Deep Lake (68°33'36.8S,  
11 78°11'48.7E), Vestfold Hills, Antarctica between November 30 and December 5, 2008, by  
12 filtering water taken from 5, 13, 24 and 36 m depths (50 litres except 25 litres from 36 m),  
13 through a 20 µm prefilter sequentially onto 293 mm polyethersulfone membrane filters with  
14 3.0, 0.8 and 0.1 µm pore sizes, as described previously (1). In addition, a surface sample (50  
15 litres) was taken from close to the lake shore. All filters were placed in storage buffer, frozen  
16 in liquid nitrogen and cryogenically maintained at -80°C until being processed (1).

17 **Metaproteomics.** Protein extractions, mass spectrometry and data analysis were  
18 performed based on methods described previously (2), with minor modifications. Briefly,  
19 proteins were extracted without filtering protein suspensions through a 0.22 µm filter, protein  
20 concentrations were determined with the Pierce BCA Protein Assay Kit (Thermo Fisher  
21 Scientific, Rockford, IL, USA), and 25 µg protein of each sample was processed for mass  
22 spectrometry (MS) in a buffer containing a final concentration of 25 mM NH<sub>4</sub>HCO<sub>3</sub>, pH 8 –  
23 8.5 (assessed using pH indicator strips). Samples were reduced with 2.5 mM dithiothreitol for  
24 30 min at 37°C in the dark, alkylated with 5 mM iodoacetamide for 30 min at room  
25 temperature in the dark, trypsin digestion performed with 0.3 µg trypsin (Sequencing Grade

26 Modified Trypsin, Promega, Madison, WI, USA) overnight at 37°C, and peptides stored at -  
27 80°C until MS analysis. Peptide solutions were diluted 1:2 in 1% formic acid, 0.05%  
28 heptafluorobutyric acid and subjected to LC-MS/MS. LC-MS/MS was performed as  
29 described previously (3), with the only modification being the use of 3 μ, 200 Å instead of 5  
30 μ, 200 Å C18 media in the nano column (Magic, Michrom Bioresources, Auburn CA, USA).  
31 At least two technical replicates were performed for each sample.

32 Peak lists from Orbitrap Velos mass spectra were generated using extract\_msn and  
33 peptides identified through automated database searches using Mascot Daemon and the  
34 Mascot server (version 2.3; Matrix Science, Thermo, London, UK) with ThermoFinnigan  
35 LCQ/DECA RAW file as the import filter and the following settings: one accepted missed  
36 cleavage for the tryptic digest, peptide mass tolerance of +/- 4 p.p.m., fragment mass  
37 tolerance of +/- 0.4 Da and variable modifications of oxidation and carbamidomethylation.  
38 Ions were matched against peptides using a composite databases consisting of: 1) Deep Lake  
39 metagenome data, which comprised 5,837 contigs > 2 kb in length from the assembled  
40 contigs previously generated and annotated using SHAP representing 38,071 predicted  
41 protein sequences (1, 4) available at  
42 [http://genome.jgi.doe.gov/pages/dynamicOrganismDownload.jsf?organism=AntLakMetagen](http://genome.jgi.doe.gov/pages/dynamicOrganismDownload.jsf?organism=AntLakMetagenome)  
43 [ome](http://genome.jgi.doe.gov/pages/dynamicOrganismDownload.jsf?organism=AntLakMetagenome) (Antarctic Lakes Metagenome: whole\_lake.gbk); and 2) all 14,181 predicted protein  
44 sequences from *Hht. litchfieldiae*, DL31, *Hrr. lacusprofundi* and DL1 sourced from the IMG  
45 portal (<http://img.jgi.doe.gov/>) (5). To facilitate calculations of false discovery rates (FDRs),  
46 the database contained randomized decoy proteins equal in number to those present in the  
47 reference database. The mass spectrometry proteomics data have been deposited to the  
48 ProteomeXchange Consortium (<http://proteomecentral.proteomexchange.org>) via the PRIDE  
49 partner repository (6) with the dataset identifier PXD001436 and DOI 10.6019/PXD001436.

50 All technical replicates of a sample were combined and merged into a single sample file  
51 during Mascot analysis, resulting in 15 sample files (5 depths x 3 filters). Peptide and protein  
52 validation and further analysis was performed using Scaffold (version Scaffold\_4.2.1,  
53 Proteome Software Inc., Portland, OR, USA) with strict settings of 95% minimum peptide  
54 identification probability and 99% minimum protein identification probability. The majority  
55 of proteins were identified with at least two peptide matches. The number of confidently  
56 identified proteins was maximized while minimizing false positives by including single  
57 peptide matches but maintaining low FDRs, as has been recommended (7, 8) and successfully  
58 applied in recent metaproteomic studies (9, 10, 11). The peptide and protein FDRs were  
59 0.06% and 0.4%. For quantitative analyses the Normalized Total Spectrum Count  
60 (Scaffold\_4.2.1, Proteome Software Inc., Portland, OR, USA) for each identified protein was  
61 combined across all 15 samples and used to quantify abundance.

62 All identified proteins were manually annotated using BLASTP searches against the  
63 genome encoded proteins of *Hht. litchfieldiae*, DL31, *Hrr. lacusprofundi*, and *Halobacterium*  
64 sp. DL1 on IMG, and against all entries in the ExPASy database (12), recording the best  
65 overall match including percentage identity, and organism. Annotated proteins were  
66 categorized into taxonomic and functional groups. Taxonomic categories were *Hht.*  
67 *litchfieldiae*; DL31; *Hrr. lacusprofundi*; DL1; Other *Halobacteriaceae* (best match to a  
68 member of the *Halobacteriaceae* other than the four Deep Lake isolates); Other *Archaea*  
69 (best match to a member of the *Archaea* other than *Halobacteriaceae*); *Bacteria*; Viruses;  
70 and *Dunaliella*. Proteins sharing the same set of detected peptides were grouped into protein  
71 families (2).

72 Functional categories were: Transport; Carbohydrate Metabolism; Glycerol Metabolism;  
73 Amino Acid Metabolism; Central Carbon Metabolism; Energy Conservation; Metabolism  
74 (Other); Cell Division; DNA Replication, Repair, and CRISPR; Oxidative Stress;

75 Transduction; Transcriptional Regulators; Transcription; Ribosomes; Protein Chaperones;  
76 Translation (Other); Proteolysis; Cell Surface; Hypothetical; Viruses. Cell Surface proteins  
77 were subdivided into subcategories based on proteins that comprise archaella (Archaella),  
78 adhesion pili (Adhesion), and the archaeal surface layer including hypothetical proteins that  
79 possess Sec, TAT or PGF-TERM sequences (Cell Surface Proteins – Other). The  
80 Hypothetical category included archaeal and bacterial proteins for which no function in the  
81 cell envelope or in cellular metabolism could be inferred. Hypothetical proteins were further  
82 subdivided into subcategories based on the presence of transmembrane helices (Hypothetical  
83 - Membrane); or nucleic-acid-binding domains (Hypothetical - Nucleic Acid Binding); or  
84 possessed domains which provided no indication as to function or possessed no identifiable  
85 domains at all (Hypothetical - Other). Other categories were subdivided into subcategories to  
86 provide increased resolution of cellular processes such as transport and metabolism.  
87 Transport: ABC Transporter - Amino Acids; ABC Transporter - Oligopeptides/Dipeptides;  
88 ABC Transporter - Carbohydrates; ABC Transporter - Phosphate/Phosphonate; ABC  
89 Transporter - Iron; ABC Transporter (Other); TRAP/TTT Transport; Cation Transport;  
90 Secretion; Other Transporter. Carbohydrate Metabolism: Glycosylation/Capsular  
91 Polysaccharide; Carbohydrate Metabolism (Other). Metabolism (Other): Nitrogen  
92 Metabolism; Sulfur Metabolism; Isoprenoid Metabolism; Vitamin/Cofactor Biosynthesis;  
93 Other (comprising those proteins inferred to be involved in metabolism, but no precise  
94 function or substrate specificity could be inferred based on identified domains). DNA  
95 Replication, Repair and CRISPR: DNA Replication and Repair; CRISPR.

96 **Gene mapping.** Genes in the tADL-II contigs were mapped onto the *Hht. litchfieldiae*  
97 tADL genome using the CONTIGuator web server (13) and by manual assignment, and  
98 circular plots were created using DNAPlotter (14) in Artemis (15).

99       **Correlation analysis.** Fractionation of the Deep Lake biomass according to depth and  
100 filter size allowed a comparison of the abundances (measured in spectrum counts) of single  
101 proteins and proteins from functional categories across samples thereby enabling ecological  
102 inferences to be made from observed co-expression. The analyses enabled statistically valid  
103 positive or negative correlations to be determined between spectrum counts for proteins  
104 across the 15 filter samples. Pair-wise comparisons of spectrum counts were made between  
105 individual abundant proteins, functional categories of proteins (the sum of the spectrum count  
106 for a functional group, such as tADL ABC transporter proteins) or taxonomic groups of  
107 proteins (for example all *Hht. litchfieldiae* tADL proteins vs all *Dunaliella* proteins). Pearson  
108 correlation coefficient and p-values between single proteins or protein functional categories  
109 across the 15 filter samples were calculated in R (16) with the Hmisc package (17) using  
110 normalized total spectrum counts. Only correlations with a p-value < 0.01 were regarded as  
111 statistically significant. All results of correlation analyses can be found in Table S2, and  
112 correlations mentioned in the manuscript are highlighted separately in Table S1.

113       **Statistics using the PRIMER 6 software package.** Statistical analyses were performed  
114 with PRIMER 6 (18) using the normalized total spectrum count for functional categories  
115 from each of the 15 samples. The data were standardized and square-root transformed prior to  
116 calculations using a Bray Curtis resemblance matrix. Non-metric multi-dimensional scaling  
117 (NMDS) plots were created using standard settings. Two-way crossed analysis of similarity  
118 (ANOSIM) without replicates were performed on the factors, filter size and sample depth, to  
119 test for statistically significant differences within these groups.

120       **Epifluorescence microscopy.** Deep Lake surface water samples were taken in the  
121 Antarctic summer of 2008/2009 and preserved in 2% (v/v) formaldehyde, or in 2013/2014  
122 and preserved in 0.5% (v/v) glutaraldehyde, and all samples were stored at -80 °C until  
123 microscopy was performed. Deep Lake water (4 ml) was filtered through a 25 mm diameter,

124 0.02 µm pore size Whatman® Anodisc filter membrane (GE Healthcare Life Science, UK)  
125 with a 0.45 µm pore size backing filter (Type HA, Merck Millipore, MA, USA). Filters with  
126 captured biomass were stained with 10 µl SYBR® Gold nucleic acid stain (Invitrogen, Life  
127 Technologies, NY, USA) for 18 min in the dark and subsequently mounted on a glass slide  
128 with a drop of ProLong® Gold anti fade reagent (Invitrogen, Life Technologies, NY, USA).  
129 Microscopic analysis of slides was performed using an Olympus BX51WI epifluorescence  
130 microscope together with an Olympus DP71 camera and the cell Sense Standard imaging  
131 software (all Olympus, Hamburg, Germany). Slides were visualized under excitation with  
132 blue light (460 – 495 nm, emission 510 – 550 nm).

133 **Growth studies.** To assess growth characteristics based on inferences made from Deep  
134 Lake metaproteomic data, *Hht. litchfieldiae* was grown in batch cultures based on DBCM2  
135 media (19, 20) using specific carbon and nitrogen sources. The substrates tested were DHA  
136 (10 mM) as a carbon source; starch (10 gL<sup>-1</sup>) as a carbon source; acetamide (10 mM) as both  
137 a carbon source (with ammonia) or as a nitrogen source (with pyruvate); 2-  
138 aminoethylphosphonic acid (AEP; 5 mM) as a phosphorus source replacing phosphate in  
139 DBCM2 medium (tested both with and without peptone and yeast extract); *Hht. litchfieldiae*  
140 genomic DNA (200µg ml<sup>-1</sup> final concentration) as a phosphorus source.

141

## 142 **RESULTS AND DISCUSSION**

143 **Microscopy.** To facilitate interpretation of the metaproteomic data, microscopy was  
144 performed on water samples to assess cell state (aggregated vs non-aggregated) and presence  
145 of particulate matter associated with 3.0, 0.8 and 0.1 µm filters. The samples preserved in  
146 glutaraldehyde provided clearer images than those preserved in formaldehyde (see Materials  
147 and Methods; data not shown). An increase in particulate matter was observed with increase  
148 in pore size, and cells were often associated with the particulate matter (Fig. S2).

149 *Hht. litchfieldiae*. Carbohydrate metabolism: The *Hht. litchfieldiae* genome encodes two  
150 pathways for the conversion of glycerol into dihydroxyacetone phosphate (DHAP) (20). The  
151 first catabolic pathway involves the ATP-dependent phosphorylation of glycerol to glycerol-  
152 3-phosphate by glycerol kinase, followed by the oxidation of glycerol-3-phosphate to DHAP  
153 by glycerol-3-phosphate dehydrogenase. The second catabolic pathway begins with the  
154 oxidation of glycerol to DHA by glycerol dehydrogenase, followed by the phosphorylation of  
155 DHA by DHA kinase to DHAP. DHAP is a versatile substrate that can enter into glycolysis  
156 or gluconeogenesis; serve as a precursor for membrane phospholipids via glycerol-1-  
157 phosphate; or be converted to methylglyoxal as a precursor for aromatic acid biosynthesis  
158 (21) (see **Nitrogen and amino acid metabolism**). Evidence for the first glycerol catabolic  
159 pathway included the detection of glycerol kinases and glycerol-3-phosphate dehydrogenase,  
160 whereas for the second pathway DHA kinase subunits were detected, but no glycerol  
161 dehydrogenase. The enzymes for the first pathway were also more abundant than for the  
162 second pathway (Table S5). The lack of detection of glycerol dehydrogenase for *Hht.*  
163 *litchfieldiae* might be due to repression of gene expression, which has been observed in *H.*  
164 *salinarum* R1 as a possible mechanism to promote glycerol phosphorylation and decrease the  
165 flow of glycerol to DHA (22). Thus, rather than being utilized for glycerol oxidation, it is  
166 possible that DHA kinase is used solely to catabolize DHA directly obtained from the  
167 environment. DHA is exuded as a byproduct of the breakdown of surplus glycerol in  
168 *Dunaliella* (23, 24) and has been hypothesized to be an important growth substrate for  
169 haloarchaea in hypersaline lakes (24).

170 The iron-containing glycerol dehydrogenase characterized for haloarchaea (25) has a  
171 homolog in *Hht. litchfieldiae* (tADL\_2148), but this was not detected in the metaproteome. It  
172 is possible that a novel (for archaea) glycerol dehydrogenase may be present in the Deep  
173 Lake metaproteome, including a glycerol dehydrogenase of the short-chain

174 dehydrogenase/reductase (SDH) family in bacteria (26), or a glycerol dehydrogenase of the  
175 aldo/keto reductase family in eukaryotes (27); *Hht. litchfieldiae* homologs of both were  
176 detected in the metaproteome, although their substrate specificity cannot be determined from  
177 the sequences.

178 Initially, no growth was detected for *Hht. litchfieldiae* using DHA as the defined carbon  
179 and energy source; but when *Hht. litchfieldiae* was grown on medium containing both DHA  
180 and pyruvate and was then transferred to medium containing just DHA, growth was observed  
181 (Fig. S5B). A similar response was observed previously for *Hht. litchfieldiae* where it grew  
182 with glycerol as the defined carbon and energy source only after being transferred from  
183 media containing both pyruvate and glycerol (20).

184 Phosphorus metabolism: AEP (ciliatine) was tested as a phosphorus source; this  
185 phosphonate and its N-alkylated derivatives are the most abundant and ubiquitous of  
186 naturally occurring phosphonates (28). Initially no growth of *Hht. litchfieldiae* was observed  
187 when AEP was tested as a phosphorus source in place of phosphate in the DBCM2 medium  
188 (lacking peptone and yeast extract). In addition to providing a phosphorus source, phosphate  
189 also serves to help buffer DBCM2 medium. The absence of phosphate buffer might therefore  
190 have an adverse effect on cell growth or viability. Although Tris.Cl was used to bring the pH  
191 of DBCM2 to 7.5 prior to the addition of AEP (5 mM), further Tris.Cl was added after the  
192 addition of AEP to reach a final concentration of ~5 mM and buffer at pH 7.5. This addition  
193 of Tris.Cl allowed *Hht. litchfieldiae* to grow on AEP as a source of phosphorus (Fig. S5A).

194 A putative DNA-binding membrane protein (halTADL\_0044; winged helix-turn-helix  
195 DNA-binding domain) was detected for *Hht. litchfieldiae*. The encoding gene neighbors a  
196 gene (halTADL\_0045) that is homologous to *H. volcanii* Hvo\_1477, which is involved in the  
197 utilization of DNA as a phosphate source for growth (29). DNA concentrations can be  
198 particularly high in hypersaline environments (30) and the very low temperatures in Deep



199 Lake should further help to preserve extracellular DNA. Laboratory assessments indicated  
200 *Hht. litchfieldiae* was unable to utilize DNA as a phosphorus source for growth; this requires  
201 further evaluation in view of the metaproteome data.

202 Nitrogen and amino acid metabolism: An acetamidase homolog (amidohydrolase) was  
203 detected for *Hht. litchfieldiae* (halTADL\_0419), but its function is unclear. *Hht. litchfieldiae*  
204 showed no growth in DBCM2 medium containing acetamide as a carbon source, which is  
205 consistent with the absence of genes that encode enzymes for acetate assimilation via either  
206 the methylaspartate cycle or glyoxylate cycle (20). However, *Hht. litchfieldiae* was also  
207 incapable of using acetamide as a nitrogen source in DBCM2 medium.

208 The detection of a putative copper-containing nitrite reductase (nitric oxide forming;  
209 halTADL\_2997) and halocyanin acceptor protein (halTADL\_2996) provides possible  
210 evidence of active denitrification by *Hht. litchfieldiae*. The use of nitrite as an electron  
211 acceptor might indicate oxygen depleted conditions, at least in the micro-environment of the  
212 *Hht. litchfieldiae* cells at the time of sampling.

213 The detection of S-adenosylmethionine (SAM) synthetase (halTADL\_3028) indicates  
214 that methionine is converted to SAM, an important methyl donor for processes including  
215 DNA methylation and cofactor biosynthesis (heme, cobalamin (31)). The product of SAM  
216 demethylation (S-adenosyl-homocysteine) can be hydrolyzed to homocysteine; the enzyme  
217 responsible (S-adenosylhomocysteinase, halTADL\_1723) was also detected. Further, in  
218 archaea homocysteine is a precursor to cysteine via the path leading through cystathionine  
219 (25, 32), which might suggest that cysteine is synthesized from methionine by *Hht.*  
220 *litchfieldiae* in Deep Lake. We also detected three proteins corresponding to enzymes  
221 involved in the generation of chorismate from fructose-1,6-bisphosphate(halTADL\_0575,  
222 halTADL\_0574, halTADL\_2582), as well as enzymes specific to the synthesis of tryptophan

223 (halTADL\_0576, halTADL\_3066, halTADL\_0889) and phenylalanine (halTADL\_2073)  
224 (33), indicating aromatic acid synthesis in Deep Lake.

225 Motility and taxis: The *Hht. litchfieldiae* MCPs included HtrII for sensory rhodopsin II  
226 (SRII; phoborhodopsin), which is indicative of negative phototaxis as the repellent receptor  
227 SRII is activated by blue light and is produced when respiratory activity is high and cells seek  
228 darker conditions to minimize photo-oxidative damage (34) (Also see main text section  
229 **Haloarchaeal responses to Antarctic solar irradiation**, and Table S7). One MCP belongs  
230 to the HemAT family of heme-based transducers involved in aerotaxis (35), and another has  
231 an N-terminal globin domain and may function in aerotaxis or oxidative stress. The MCP  
232 halTADL\_1218 has similarity to MCPs involved in chemotaxis of organic nutrients (36), and  
233 consistent with this, the gene is located within a cluster of genes which function to uptake and  
234 catabolize lactate.

235 One-carbon (C1) metabolism: The major C1 carrier in haloarchaea is tetrahydrofolate  
236 (H<sub>4</sub>F), which is essential for the biosynthesis of methionine, glycine, purines, and thymidine  
237 (37). Several proteins involved in the biosynthesis of this cofactor were detected in the  
238 metaproteome, as well as H<sub>4</sub>F-dependent proteins (e.g., purine biosynthesis in *Hht.*  
239 *litchfieldiae*). However, there was evidence of expression of a methanopterin-based C1  
240 transfer system in *Hht. litchfieldiae* in Deep Lake, with tetrahydromethanopterin (H<sub>4</sub>MPT)  
241 used as the carrier. The H<sub>4</sub>MPT-associated C1 transfer enzyme methenyl-H<sub>4</sub>MPT  
242 cyclohydrolase (Mch; halTADL\_3392) was detected in the metaproteome, as well as a  
243 NADPH-dependent F<sub>420</sub> reductase (halTADL\_2320). Both H<sub>4</sub>MPT and cofactor F<sub>420</sub> were  
244 likely inherited from methanogenic archaea, given the posited origin of haloarchaea (38, 39).  
245 The function of the H<sub>4</sub>MPT system in *Hht. litchfieldiae* is unclear; there are no clear  
246 homologs of genes for either methylotrophy or formaldehyde activation in the genome, and it  
247 is not known this H<sub>4</sub>MPT-dependent pathway proceeds in the oxidative or reductive

248 directions. For example, the sulfate-reducing archaeon *Archaeoglobus fulgidus* cleaves  
249 acetyl-CoA into a methyl group and CO<sub>2</sub>, and subsequent oxidation of the H<sub>4</sub>MPT-bound  
250 methyl group serves as a source of energy (40); but this pathway is unlikely for *Hht.*  
251 *litchfieldiae* in the absence of genes encoding a complete carbon monoxide  
252 dehydrogenase/acetyl-CoA complex required for acetyl-CoA cleavage. One possibility is that  
253 methyl groups are generated internally via catabolism (such as methylphosphonate; see  
254 **Phosphorus metabolism**), and either oxidized for energy or assimilated by *Hht. litchfieldiae*.  
255 Genes for certain H<sub>4</sub>MPT-associated C1 transfer proteins (including methylene-H<sub>4</sub>MPT  
256 reductase) are found adjacent to the gene cluster for phosphonate degradation in the *Hht.*  
257 *litchfieldiae* genome (20). If *Hht. litchfieldiae* utilizes phosphonates as a carbon source, then  
258 C1 compounds might be transferred to H<sub>4</sub>MPT and oxidized to the formyl level; this latter  
259 step could be catalyzed by Mch for liberated methyl groups. It is possible that the Mch  
260 product (formyl-H<sub>4</sub>MPT) serves a biosynthetic function; but (unlike formyl-H<sub>4</sub>F) formyl-  
261 H<sub>4</sub>MPT has been regarded as unsuited to formyl donations for biosynthesis (41).

262 Heavy metal efflux: The concentrations of lead (3.7-5.2 µg/L) and copper (9.1 to 21  
263 µg/L; copper concentrations showed a marked decrease with depth) in Deep Lake were found  
264 to be much higher than seawater, although not at levels high enough to inhibit microbial  
265 growth (42). This may account for a putative Cu<sup>2+</sup>-exporting ATPase (halTADL\_1767)  
266 detected for *Hht. litchfieldiae*.

267 ***Hht. litchfieldiae* variants**. GC/read-depth profiling of the *de novo* assembly of  
268 metagenome data revealed a cluster of 52 large contigs (>15 kb) totalling 1.89 Mb which had  
269 highest identity (~85%) to *Hht. litchfieldiae* tADL, and the genes on the contigs tended to be  
270 syntenic with tADL (1). The contig cluster was referred to as the ‘tADL-related 5th genome’  
271 (1), and has now been designated *Hht. litchfieldiae* strain ‘tADL-II’. A total of 107 proteins

272 were identified from 38 of the contigs (Table S9). The proteins on the contigs that matched  
273 tADL had ~70 – 99% sequence identity (lower for some cell surface proteins).

274 Thirty eight additional variants on 22 contigs were further assigned to tADL-II (Table  
275 S9) even though the corresponding contigs were not part of the original GC/read-depth  
276 binning. These variants are derived from contigs each containing multiple ORFs with ~70 –  
277 99% amino acid identity to tADL sequences (lower for some cell surface proteins) and  
278 exhibiting gene synteny with tADL; characteristics shared with the contigs previously  
279 assigned to tADL-II. These included 11 ribosomal proteins that had 88 – 97% sequence  
280 identity to tADL. A total of 18 of the 22 contigs were shorter than 15 kb and would have been  
281 excluded from the previous analyses (1). Scaffolding of the 52 original contigs with the 22  
282 new contigs revealed that 10 of the new contigs overlapped (at their ends) with the original  
283 contigs and were assembled into larger contigs. These 10 contigs encoded for 24 of the newly  
284 assigned tADL-II proteins. Mean read-depth/GC-content was also comparable with 38.8/63%  
285 for the original set of 52 contigs and 35/61% for the additional 22 contigs.

286 High variation was observed between tADL and tADL-II sequences for cell surface  
287 proteins (63% average amino acid identity) in contrast to substantially less variation for  
288 typically conserved, transcription and cell division proteins ( $\geq 94\%$ ) (Fig. 4). The divergence  
289 between tADL and tADL-II proteins is likely to result in phenotypic distinctions, as even  
290 single amino acid changes can confer functional differences (e.g. in the active-site, substrate  
291 binding site, site of interaction for effector molecules, protein-protein interactions). Other  
292 proteomic distinctions between tADL and tADL-II included proteins encoded by genes  
293 present on tADL-II contigs that were absent in the tADL genome. The detection of a  
294 nitrate/sulfonate/bicarbonate ABC transporter solute-binding lipoprotein (unique to tADL-II)  
295 may confer the ability to target distinct nutrient sources (Table S9).

296 In contrast to the level of variation for contigs assigned to tADL-II, proteins were  
297 identified matching to contigs which had overall high identity to tADL. These contigs had  
298 ORFs with 100% identity to tADL plus some ORFs (typically one) with 97-99% identity, and  
299 were therefore assigned as variants of tADL. These comprised a total of 8 variants for which  
300 6 had 99% identity (5 single SNPs plus 1 with a 3 nt deletion) and 2 had 97% identity, and all  
301 had neighbouring genes with 100% sequence identity and conserved gene synteny with  
302 tADL.

303 One of the variants was an ABC transporter phosphate-binding lipoprotein which arose  
304 from a previously identified SNP (1). The SNPs characterized in the previous study  
305 represented  $\geq 90\%$  of the population (1), indicating it was the dominant form in the  
306 population. In addition, two other variants of the same protein (88% and 93% sequence  
307 identity) were identified in the metaproteome, both of which were encoded on contigs that  
308 could potentially be assigned to tADL-II. The amino acid changes for the transporter may  
309 confer functional differences in *Hht. litchfieldiae* phosphate acquisition. Multiple cell surface  
310 protein variants were previously identified which mapped to small regions of the tADL  
311 genome that had low fragment recruitment of metagenome data, with the high level of  
312 variation thought to provide a mechanism for hosts to evade viral infection (2).

313 In another case, one  $\alpha$ -amylase was detected with 94% sequence identity to tADL and  
314 the only other ORF on the contig matched tADL with 96% sequence identity, and the two  
315 ORFs were syntenic with tADL. For the same  $\alpha$ -amylase, a protein with 100% match to  
316 tADL was also identified (therefore assigned to tADL), and one that matched to tADL-II  
317 (84% identity to tADL). The data suggest that the 94% match could therefore derive from a  
318 variant of *Hht. litchfieldiae*. However, intergenera gene exchange has also been documented  
319 for the Deep Lake community, and it is possible that the contig derives from one of the other  
320 haloarchaeal species in the lake. From a functional standpoint, similar to the ABC transporter

321 phosphate-binding lipoprotein (above), the extent of variation of the  $\alpha$ -amylase proteins may  
322 increase the capacity of the lake population to utilize starch-related substrates.

323 For a total of 15 proteins, the best match was to *Hht. litchfieldiae*, but other ORFs on the  
324 contigs matched to other haloarchaea or viruses. These included three distinct proteins, all  
325 matching to the same *Hht. litchfieldiae* glycerol kinase with 98% sequence identity. These  
326 findings are consistent with the dissemination of genes within the lake population and  
327 selection for a collective genetic capacity to effectively exploit available nutrients throughout  
328 the lake.

329 **DL31 and *Hrr. lacusprofundi* variants.** Only four respectively three variants were  
330 detected for DL31 and *Hrr. lacusprofundi*, with five of them associated with the haloarchaeal  
331 cell surface (Table S10). One of the *Hrr. lacusprofundi* variants represents an archellin  
332 protein with a particularly high level of variation (38%). An additional archaellin protein with  
333 less variation to *Hrr. lacusprofundi* (77%) mapped to a contig where the neighboring genes  
334 matched best to *Halorubrum* spp., but not specifically *Hrr. lacusprofundi* (Table S11). These  
335 findings provide further support for the importance of archaellin variation within the *Hrr.*  
336 *lacusprofundi* population (2). In addition, two variants matched to DL31 but neighboring  
337 genes matched to other haloarchaea (Table S11). Four variants, including a carbohydrate  
338 ABC transporter protein matched to *Hrr. lacusprofundi* but with neighboring contig genes  
339 matching to other haloarchaea (Table S11). The contigs matching other haloarchaea may  
340 represent islands of genomic DNA present within strains of *Hrr. lacusprofundi*, or derive  
341 from other low abundance haloarchaeal species in the lake.

342 **DL31 metabolism and cell function.** DL31 oligopeptide and iron ABC transporters  
343 were positively correlated with the highly abundant DL31 protein Halar\_1791 of unknown  
344 function (Table S1). DL31 protein Halar\_1791 was the 5<sup>th</sup> most abundant protein for DL31  
345 (29<sup>th</sup> overall in the metaproteome). It belongs to the MmpL (mycobacterial membrane protein

346 large) transporter family of the extended RND (Resistance-Nodulation-Cell Division)  
347 permease superfamily (43, 44). Thus, we infer that Halar\_1791 is a transporter. Homologs of  
348 Halar\_1791 are found across *Halobacteriales* genomes, although their function has not been  
349 experimentally determined. In mycobacteria, MmpL transporters are involved in lipid export  
350 and antibiotic efflux (43, 45, 46). The distribution of Halar\_1791 protein was positively  
351 correlated with the two most abundant proteins for DL31, oligopeptide- and iron-binding  
352 lipoproteins of ABC transporters, and we therefore speculate that the three transporters may  
353 be functionally associated. Halar\_1791 also showed a positive correlation with most *Hht.*  
354 *litchfieldiae* archaellin proteins (Tables S1 and S2). It also showed a positive correlation with  
355 the most abundant *Hrr. lacusprofundi* TRAP transporter (Hlac\_2586) and oligopeptide ABC  
356 transporter (Hlac\_0069), and bacterial porin and TonB transporter receptor. Overall, these  
357 correlations underscore the potential importance of Halar\_1791 to the acquisition of nutrients  
358 by DL31. Another MmpL/RND permease transporter was detected in the Deep Lake  
359 metaproteome for *Hht. litchfieldiae* (halTADL\_0082), but at very low abundance.

### 360 **General features of *Hht. litchfieldiae*, DL31 and *Hrr. lacusprofundi* in Deep Lake.**

361 Cell surface and glycosylation: The surface layer (S-layer) glycoprotein forms a  
362 paracrystalline lattice that functions as the haloarchaeal cell envelope (2, 47). Detected  
363 putative cell surface glycoproteins of the three dominant haloarchaea (halTADL\_1043,  
364 Halar\_0829, Hlac\_2976, Hlac\_0412) are likely to be the major S-layer proteins, which  
365 accounts for their high abundance in the samples. These form a porous, two-dimensional  
366 lattice that encases the cell, with the S-layer proteins anchored in the cell membrane, and the  
367 S-layer envelope separated from the cell membrane by a ‘quasi-periplasmic space’ (47). In  
368 addition, S-layer proteins and other surface-exposed proteins (archaella, pilins) are post-  
369 translationally modified by glycosylation (48, 49, 50, 51). N-glycosylation of S-layer proteins  
370 proceeds via a process involving multiple archaeal glycosylation (Agl) proteins, of which the

371 most conserved is oligosaccharyltransferase AglB, a membrane-bound protein that transfers  
372 the glycan moiety to the protein (50). Aside from AglB, little if any sequence identity is  
373 shared among other glycosylation enzymes across haloarchaeal species (50). AglB was  
374 detected for *Hht. litchfieldiae* (halTADL\_2411). Other proteins in the metaproteome were  
375 implicated in glycosylation of surface proteins, based on homologs involved in N-  
376 glycosylation of proteins in other haloarchaea (49, 50, 52); these include a sugar  
377 nucleotidyltransferase (halTADL\_3353), a glycosyltransferases (halTADL\_2565), NUDIX  
378 hydrolases (halTADL\_3253, halTADL\_2550), and a nucleoside-diphosphate-sugar  
379 epimerase/hydratase (halTADL\_3057).

380 Isoprenoid metabolism: The cell membrane lipids of haloarchaea consist of glycerol  
381 diether lipids with prenyl side chains. The glycerophosphate backbone of these membrane  
382 lipids is formed from glycerol 1-phosphate (see **Carbohydrate metabolism**), and the prenyl  
383 side chains and other isoprenoids are derived via the mevalonate pathway (25, 53). The  
384 isoprene-based lipids used for lipid modification of S-layer glycoproteins in haloarchaea are  
385 also synthesized via the mevalonate pathway (54). Isoprenoid biosynthesis proteins were  
386 detected in the metaproteome, including an enzyme (phytoene synthase; halTADL\_0465)  
387 involved in retinal production for rhodopsins in *Hht. litchfieldiae*.

388 Sulfur metabolism: The mechanism for reductive sulfate assimilation in haloarchaea has  
389 yet to be resolved (25, 55). Several hypothetical rhodanese domain proteins have been  
390 proposed as thiosulfate sulfurtransferase or sulfite reductase in haloarchaea (55); homologs of  
391 these proteins were detected for the three dominant Deep Lake haloarchaea (halTADL\_2750,  
392 Halar\_2935, Hlac\_1687). *Hht. litchfieldiae* has been reported to produce H<sub>2</sub>S from thiosulfate  
393 (56). A detected sulfotransferase (halTADL\_1176) showed closest sequence identity to  
394 phosphoadenylylsulfate (PAPS) reductase; PAPS is the universal sulfate donor for the



395 sulfation of lipids and sugars (57), so this enzyme may function in sulfate transfers required  
396 for the biosynthesis of sulfated lipids and/or sugars.

397 Osmotic adaptation: A PspA homolog was detected for *Hht. litchfieldiae*  
398 (halTADL\_2278). In bacteria, the transcriptional activator PspA plays a role in sensing a  
399 variety of membrane stressors, including phage infection, heat shock, and osmotic shock (58).  
400 Proteomic analysis of *H. volcanii* showed that the PspA homolog was more abundant in high-  
401 salt conditions, suggesting that it may play an important role in hypersaline adaptation,  
402 although the mechanism is not known (59). In light of virus infection of *Hht. litchfieldiae* in  
403 Deep Lake (2), it is also possible that the PspA homolog in *Hht. litchfieldiae* is also  
404 responsive to membrane perturbation resulting from infection.

405 Homologs of osmotic inducible protein C (OsmC) were detected for DL31 (Halar\_1442)  
406 and *Hrr. lacusprofundi* (Hlac\_1348). OsmC was originally identified in *E. coli* in response to  
407 osmotic shock (60), and accumulates in cells exposed to high external osmolality (61).  
408 Because OsmC displays peroxiredoxin-like activity against organic hydroperoxides, it has  
409 been inferred to have cross-protectivity against elevated osmolality and oxidative stress (61).  
410 However, in a proteomic study of the archaeon *Thermococcus kodakaraensis*, OsmC was  
411 found to have increased abundance in response to osmotic stress, but not oxidative stress  
412 (62).

413 Adhesion: Distinct from archaea, type IV pilus proteins (PilA) were detected for *Hht.*  
414 *litchfieldiae* (halTADL\_1387, halTADL\_0751, halTADL\_1387), DL31 (Halar\_2365,  
415 Halar\_3709), and *Hrr. lacusprofundi* (Hlac\_1363, Hlac\_3311) (Table S3). These pili are  
416 essential for some haloarchaea to adhere to surfaces (48, 63, 64), and a large DL31 pilus  
417 protein (653 aa) contained a PKD domain which may promote intercellular interactions in  
418 archaea (65).

419 Cell division and growth: Haloarchaea typically have a FtsZ-based system for  
420 cytokinesis (66). FtsZ proteins were detected in the Deep lake metaproteome, matching *Hht.*  
421 *litchfieldiae* (halTADL\_0937, halTADL\_3056) and DL31 (Halar\_2224). A possible  
422 MreB/FtsA cell division protein was also detected for *Hht. litchfieldiae* (halTADL\_0130).  
423 Another protein implicated in cell division is an ATPase containing dual CDC48 (Cell  
424 division control protein 48) domains, which belongs to a class of VCP (Valosin Containing  
425 Protein)-like archaeal proteins that are implicated in the regulation of the cell cycle (67);  
426 these were detected for *Hht. litchfieldiae* (halTADL\_2740) and DL31 (Halar\_1865,  
427 Halar\_2098).

428 Energy metabolism: ATP synthase and/or respiratory chain proteins were detected for  
429 *Hht. litchfieldiae*, DL31, and *Hrr. lacusprofundi* consistent with the generation of metabolic  
430 energy. The detection of a cytoplasmic inorganic pyrophosphatase for *Hht. litchfieldiae*  
431 (halTADL\_1644 ) is undoubtedly important to energy metabolism, given that pyrophosphate  
432 is generated as a byproduct of numerous metabolic processes (including phosphonate  
433 degradation; see **Phosphorus metabolism**), and pyrophosphate hydrolysis is a highly  
434 exergonic reaction that can be used to facilitate less energetically favourable processes (68).

435 **Other microorganisms in Deep Lake. *Dunaliella*:** It is likely that the lake's primary  
436 producer *Dunaliella* is underrepresented in the Deep Lake metaproteome data as metagenome  
437 analyses identified few matches to available *Dunaliella* sequence data (1). In the  
438 metaproteome, a total of six chloroplast proteins were detected: a translation initiation factor,  
439 ribulose bisphosphate carboxylase/oxygenase (large chain), and chloroplast ATP synthase  
440 subunits. These provide evidence for photosynthesis and carbon fixation by *Dunaliella*.

441 *Halobacterium* sp. DL1: Proteins were detected for *Halobacterium* sp. DL1, a low  
442 abundance (~0.3% of the community (20)) haloarchaeon in Deep Lake, including S-layer  
443 glycoprotein, ATP synthase subunit, an archaellin, and a BCAA ABC transporter lipoprotein.

444 The expression of this last protein is consistent with genomic evidence, by which DL1 was  
445 inferred to have a metabolic preference for amino acids, especially BCAA (20).

446 Bacteria: Thirty six proteins showed the best matches to bacterial proteins, although  
447 these were typically low matches, with half showing less than 50% sequence identity to  
448 known bacterial proteins. Most of the proteins showed the best matches to  
449 *Gammaproteobacteria*, including *Alteromonadales* (especially *Marinobacter* spp.) and  
450 *Oceanospirillales*; based on SSU 16S rRNA pyrotag data, these groups have been detected in  
451 Deep Lake (20). Putative bacterial proteins include cell surface proteins involved in  
452 intercellular interactions; an outer membrane conjugative transfer protein (*Marinobacter* sp.  
453 TraF (69)); and a TonB-dependent receptor and a periplasmic component of a TRAP  
454 transporter, which indicate targeting of complex substrates and carboxylates, respectively.

455

## 456 REFERENCES

- 457 1. **DeMaere MZ, Williams TJ, Allen MA, Brown MV, Gibson JA, Rich J, Lauro FM,**  
458 **Dyall-Smith M, Davenport KW, Woyke T, Kyrpides NC, Tringe SG, Cavicchioli R.**  
459 2013. High level of intergenera gene exchange shapes the evolution of haloarchaea in an  
460 isolated Antarctic lake. *Proc Natl Acad Sci USA* **110**: 16939–16944.
- 461 2. **Tschitschko B, Williams TJ, Allen MA, Páez-Espino D, Kyrpides N, Zhong L,**  
462 **Raftery MJ, Cavicchioli R.** 2015. Antarctic archaea-virus interactions: metaproteome-  
463 led analysis of invasion, evasion and adaptation. *ISME J* **9**: 2094–2107.
- 464 3. **Williams TJ, Long E, Evans F, DeMaere MZ, Lauro FM, Raftery MJ, Ducklow H,**  
465 **Grzymiski JJ, Murray AE, Cavicchioli R.** 2012. A metaproteomic assessment of winter  
466 and summer bacterioplankton from Antarctic Peninsula coastal surface waters. *ISME J* **6**:  
467 1883-1900.

- 468 4. **DeMaere MZ, Lauro FM, Thomas T, Yau S, Cavicchioli R.** 2011. Simple high-  
469 throughput annotation pipeline (SHAP). *Bioinformatics* **27**: 2431-2432.
- 470 5. **Markowitz VM, Chen IM, Palaniappan K, Chu K, Szeto E, Grechkin Y, Ratner A,**  
471 **Anderson I, Lykidis A, Mavromatis K, Ivanova NN, Kyrpides NC.** 2010. The  
472 integrated microbial genomes system: an expanding comparative analysis resource.  
473 *Nucleic Acids Res* **38**: D382-390.
- 474 6. **Vizcaino JA, Deutsch EW, Wang R, Csordas A, Reisinger F, Rios D, Dienes JA, Sun**  
475 **Z, Farrah T, Bandeira N, Binz PA, Xenarios I, Eisenacher M, Mayer G, Gatto L,**  
476 **Campos A, Chalkley RJ, Kraus HJ, Albar JP, Martinez-Bartolomé S, Apweiler R,**  
477 **Omenn GS, Martens L, Jones AR, Hermjakob H.** 2014. ProteomeXchange provides  
478 globally coordinated proteomics data submission and dissemination. *Nat Biotech* **32**: 223-  
479 226.
- 480 7. **Gupta N, Pevzner PA.** 2009. False discovery rates of protein identifications: a strike  
481 against the two-peptide rule. *J Proteome Res* **8**: 4173-4181.
- 482 8. **Claassen M.** 2012. Inference and validation of protein identifications. *Mol Cell Prot* **11**:  
483 1097-1104.
- 484 9. **Morris RM, Nunn BL, Frazar C, Goodlett DR, Ting YS, Rocap G.** 2010.  
485 Comparative metaproteomics reveals ocean-scale shifts in microbial nutrient utilization  
486 and energy transduction. *ISME J* **4**: 673-685.
- 487 10. **Schneider T, Keiblinger KM, Schmid E, Sterflinger-Gleixner K, Ellersdorfer G,**  
488 **Roschitzki B, Richter A, Eberl L, Zechmeister-Boltenstern S, Riedel K.** 2012. Who is  
489 who in litter decomposition? Metaproteomics reveals major microbial players and their  
490 biogeochemical functions. *ISME J* **6**: 1749-1762.

- 491 11. **Herbst FA, Bahr A, Duarte M, Pieper DH, Richnow HH, von Bergen M, Seifert J,**  
492 **Bombach P.** 2013. Elucidation of in situ polycyclic aromatic hydrocarbon degradation by  
493 functional metaproteomics (protein-SIP). *Proteomics* **13**: 2910-2920.
- 494 12. **Artimo P, Jonnalagedda M, Arnold K, Baratin D, Csardi G, de Castro E, Duvaud S,**  
495 **Flegel V, Fortier A, Gasteiger E, Grosdidier A, Hernandez C, Ioannidis V,**  
496 **Kuznetsov D, Liechti R, Morreti S, Mostaguir K, Redaschi N, Rossier G, Xenarios I,**  
497 **Stockinger H.** 2012. ExPASy: SIB bioinformatics resource portal. *Nucleic Acids Res* **40**:  
498 W597-603.
- 499 13. **Galardini M, Biondi EG, Bazzicalupo M, Mengoni A.** 2011. CONTIGuator: a bacterial  
500 genomes finishing tool for structural insights on draft genomes. *Source Code Biol Med* **6**:  
501 11.
- 502 14. **Carver T, Thomson N, Bleasby A, Berriman M, Parkhill J.** 2009. DNAPlotter:  
503 circular and linear interactive genome visualization. *Bioinformatics* **25**: 119-120.
- 504 15. **Carver T, Harris SR, Berriman M, Parkhill J, McQuillan JA.** 2012. Artemis: an  
505 integrated platform for visualization and analysis of high-throughput sequence-based  
506 experimental data. *Bioinformatics* **28**: 464-469.
- 507 16. **R Core Team.** 2014. R: A Language and Environment for Statistical Computing. R  
508 Foundation for Statistical Computing, Vienna, Austria. URL <http://www.R-project.org/>
- 509 17. **Frank E Harrell Jr, with contributions from Charles Dupont and many others.**  
510 2014. Hmisc: Harrell Miscellaneous. R package version 3.14-6. [http://CRAN.R-](http://CRAN.R-project.org/package=Hmisc)  
511 [project.org/package=Hmisc](http://CRAN.R-project.org/package=Hmisc)
- 512 18. **Clarke KR, Gorley RN.** 2006. PRIMER v6: User Manual/Tutorial. Primer-E, Plymouth,  
513 192pp.
- 514 19. **Burns DG, Dyall Smith M.** 2006. Cultivation of haloarchaea. *Methods Microbiol* **35**:  
515 535–552.

- 516 20. **Williams TJ, Allen MA, DeMaere MZ, Kyrpides NC, Tringe SG, Woyke T,**  
517 **Cavicchioli R.** 2014. Microbial ecology of an Antarctic hypersaline lake: genomic  
518 assessment of ecophysiology among dominant haloarchaea. *ISME J* **8**: 1645–1658.
- 519 21. **Oren A, Gurevich P.** 1995. Diversity of lactate metabolism in halophilic archaea. *Can J*  
520 *Microbiol* **41**: 302-307.
- 521 22. **Schwaiger R, Schwarz C, Furtwängler K, Tarasov V, Wende A, Oesterhelt D.** 2010.  
522 Transcriptional control by two leucine-responsive regulatory proteins in *Halobacterium*  
523 *salinarum* R1. *BMC Mol Biol* **11**: 40.
- 524 23. **Elevi Bardavid R, Oren A.** 2008. Dihydroxyacetone metabolism in *Salinibacter ruber*  
525 and in *Haloquadratum walsbyi*. *Extremophiles* **12**: 125–131.
- 526 24. **Ouellette M, Makkay AM, Papke RT.** 2013. Dihydroxyacetone metabolism in  
527 *Haloferax volcanii*. *Front Microbiol* **4**: 376.
- 528 25. **Falb M, Müller K, Königsmair L, Oberwinkler T, Horn P, von Gronau S, Gonzales**  
529 **O, Pfeiffer F, Bornberg-Bauer E, Oesterhelt D.** 2008. Metabolism of halophilic  
530 archaea. *Extremophiles* **12**: 177-196.
- 531 26. **Monniot C, Zébré AC, Aké FM, Deutscher J, Milohanic E.** 2012. Novel listerial  
532 glycerol dehydrogenase- and phosphoenolpyruvate-dependent dihydroxyacetone kinase  
533 system connected to the pentose phosphate pathway. *J Bacteriol* **194**: 4972-4982.
- 534 27. **Jung JY, Kim TY, Ng CY, Oh MK.** 2012. Characterization of GCY1 in *Saccharomyces*  
535 *cerevisiae* by metabolic profiling. *J Appl Microbiol* **113**: 1468-1478.
- 536 28. **Hildebrand RL.** 1983. The effects of synthetic phosphonates on living systems. In:  
537 Hildebrand RL (ed). *The Role of Phosphonates in Living Systems*. CRC Press, Inc., Boca  
538 Raton, pp 139–169
- 539 29. **Chimileski S, Dolas K, Naor A, Gophna U, Papke RT.** 2014. Extracellular DNA  
540 metabolism in *Haloferax volcanii*. *Front Microbiol* **5**: 57.

- 541 30. **Danovaro R, Corinaldesi C, Dell'Anno A, Fabiano M, Corselli C.** 2005. Viruses,  
542 prokaryotes and DNA in the sediments of a deep-hypersaline anoxic basin (DHAB) of the  
543 Mediterranean Sea. *Environ Microbiol* **7**:586-592.
- 544 31. **Buchenau B, Kahnt J, Heinemann IU, Jahn D, Thauer RK.** 2006. Heme biosynthesis  
545 in *Methanosarcina barkeri* via a pathway involving two methylation reactions. *J Bacteriol*  
546 **188**: 8666-8668.
- 547 32. **White RH.** 2003. The biosynthesis of cysteine and homocysteine in *Methanococcus*  
548 *jannaschii*. *Biochim Biophys Acta* **1624**: 46–53.
- 549 33. **Gulko MK, Dyall-Smith M, Gonzalez O, Oesterhelt D.** 2014. How do haloarchaea  
550 synthesize aromatic amino acids? *PLoS One* **9**:e107475.
- 551 34. **Spudich JL.** 2006. The multitasking microbial sensory rhodopsins. *Trends Microbiol*  
552 **14**: 480-487.
- 553 35. **Hou S, Larsen RW, Boudko D, Riley CW, Karatan E, Zimmer M, Ordal GW, Alam**  
554 **M.** 2000. Myoglobin-like aerotaxis transducers in Archaea and Bacteria. *Nature* **403**:  
555 540-544.
- 556 36. **Storch KF, Rudolph J, Oesterhelt D.** 1999. Car: a cytoplasmic sensor responsible for  
557 arginine chemotaxis in the archaeon *Halobacterium salinarum*. *EMBO J* **18**: 1146-1158.
- 558 37. **Levin I, Giladi M, Altman-Price N, Ortenberg R, Mevarech M.** 2004. An alternative  
559 pathway for reduced folate biosynthesis in bacteria and halophilic archaea. *Mol Microbiol*  
560 **54**:1307-1318.
- 561 38. **Nelson-Sathi S, Dagan T, Landan G, Janssen A, Steel M, McInerney JO,**  
562 **Deppenmeier U, Martin WF.** 2012. Acquisition of 1,000 eubacterial genes  
563 physiologically transformed a methanogen at the origin of Haloarchaea. *Proc Natl Acad*  
564 *Sci USA* **109**: 20537-20542.

- 565 39. **Nelson-Sathi S, Sousa FL, Roettger M, Lozada-Chávez N, Thiergart T, Janssen A,**  
566 **Bryant D, Landan G, Schönheit P, Siebers B, McInerney JO, Martin WF.** 2015.  
567 Origins of major archaeal clades correspond to gene acquisitions from bacteria. *Nature*  
568 **517:** 77-80.
- 569 40. **Möller-Zinkhan D, Börner G, Thauer RK.** 1989. Function of methanofuran,  
570 tetrahydromethanopterin, and coenzyme F<sub>420</sub> in *Archaeoglobus fulgidus*. *Arch Microbiol*  
571 **152:** 362-368.
- 572 41. **Maden BEH.** 2000. Tetrahydrofolate and tetrahydromethanopterin compared:  
573 functionally distinct carriers in C<sub>1</sub> metabolism. *Biochem J* **350:** 609-629.
- 574 42. **Barker RJ.** 1981. Physical and chemical parameters of Deep Lake, Vestfold Hills,  
575 Antarctica. Publ. No. 130. Australian National Antarctic Research Expeditions Series  
576 B(V) Limnology, 73 pp.
- 577 43. **Tekaia F, Gordon SV, Garnier T, Brosch R, Barrell BG, Cole ST.** 1999. Analysis of  
578 the proteome of *Mycobacterium tuberculosis* in silico. *Tuber Lung Dis* **79:** 329–342
- 579 44. **Sandhu P, Akhter Y.** 2015. The internal gene duplication and interrupted coding  
580 sequences in the MmpL genes of *Mycobacterium tuberculosis*: Towards understanding  
581 the multidrug transport in an evolutionary perspective. *Int J Med Microbiol* **305:** 413–  
582 423.
- 583 45. **Converse SE, Mougous JD, Leavell MD, Leary JA, Bertozzi CR, Cox JS.** 2003.  
584 MmpL8 is required for sulfolipid-1 biosynthesis and *Mycobacterium tuberculosis*  
585 virulence. *Proc Natl Acad Sci USA* **100:** 6121–6126.
- 586 46. **Pacheco SA, Hsu FF, Powers KM, Purdy GE.** 2013. MmpL11 protein transports  
587 mycolic acid-containing lipids to the mycobacterial cell wall and contributes to biofilm  
588 formation in *Mycobacterium smegmatis*. *J Biol Chem* **288:** 24213–24222.
- 589 47. **Albers S-J, Meyer BH.** 2011. The archaeal cell envelope. *Nat Rev Microbiol* **9:** 414-426.



- 590 48. **Tripepi M, Imam S, Pohlschroder M.** 2010. *Haloferax volcanii* flagella are required for  
591 motility but are not involved in PibD-dependent surface adhesion. *J Bacteriol* **192**: 3093-  
592 3102.
- 593 49. **Kaminski L, Guan Z, Yurist-Doutsch S, Eichler J.** 2013a. Two distinct N-  
594 glycosylation pathways process the *Haloferax volcanii* S-layer glycoprotein upon changes  
595 in environmental salinity. *MBio* **4**: e00716–13.
- 596 50. **Kaminski L, Lurie-Weinberger MN, Allers T, Gophna U, Eichler J.** 2013b.  
597 Phylogenetic- and genome-derived insight into the evolutionary history of N-  
598 glycosylation in Archaea. *Mol Phylogenet Evol* **68**: 327–339.
- 599 51. **Jarrell KF, Ding Y, Meyer BH, Albers SV, Kaminski L, Eichler J.** 2014. N-linked  
600 glycosylation in Archaea: a structural, functional, and genetic analysis. *Microbiol Mol*  
601 *Biol Rev* **78**: 304-341.
- 602 52. **Kaminski L, Eichler J.** 2014. *Haloferax volcanii* N-glycosylation: delineating the  
603 pathway of dTDP-rhamnose biosynthesis. *PLoS One* **9** :e97441.
- 604 53. **VanNice JC, Skaff DA, Wyckoff GJ, Miziorko HM.** 2013. Expression in *Haloferax*  
605 *volcanii* of 3-hydroxy-3-methylglutaryl coenzyme A synthase facilitates isolation and  
606 characterization of the active form of a key enzyme required for polyisoprenoid cell  
607 membrane biosynthesis in halophilic archaea. *J Bacteriol* **195**: 3854-3862.
- 608 54. **Konrad Z, Eichler J.** 2002. Lipid modification of proteins in Archaea: attachment of a  
609 mevalonic acid-based lipid moiety to the surface-layer glycoprotein of *Haloferax volcanii*  
610 follows protein translocation. *Biochem J* **366**: 959-964.
- 611 55. **Feng J, Liu B, Zhang Z, Ren Y, Li Y, Gan F, Huang Y, Chen X, Shen P, Wang L,**  
612 **Tang B, Tang XF.** 2012. The complete genome sequence of *Natrinema* sp. J7-2, a  
613 haloarchaeon capable of growth on synthetic media without amino acid supplements.  
614 *PLoS One* **7**: e41621.

- 615 56. **Mou YZ, Qiu XX, Zhao ML, Cui HL, Oh D, Dyall-Smith ML.** 2012. *Halohasta*  
616 *litorea* gen. nov. sp. nov., and *Halohasta litchfieldiae* sp. nov., isolated from the Daliang  
617 aquaculture farm, China and from Deep Lake, Antarctica, respectively. *Extremophiles* **16:**  
618 895–901.
- 619 57. **Honke K, Taniguchi N.** 2002. Sulfotransferases and sulfated oligosaccharides. *Med Res*  
620 *Rev* **22:** 637-654.
- 621 58. **Brisette JL, Weiner L, Ripmaster TL, Model P.** 1991. Characterization and sequence  
622 of the *Escherichia coli* stress-induced *psp* operon. *J Mol Biol* **220:** 35-48.
- 623 59. **Bidle KA, Kirkland PA, Nannen JL, Maupin-Furlow JA.** 2008. Proteomic analysis of  
624 *Haloferax volcanii* reveals salinity-mediated regulation of the stress response protein  
625 PspA. *Microbiol* **154:** 1436-1443.
- 626 60. **Gutierrez C, Devedjian JC.** 1991. Osmotic induction of gene *osmC* expression in  
627 *Escherichia coli* K12. *J Mol Biol* **220:** 959-973.
- 628 61. **Weber H, Polen T, Heuveling J, Wendisch VF, Hengge R.** 2005. Genome-wide  
629 analysis of the general stress response network in *Escherichia coli*: sigma S-dependent  
630 genes, promoters, and sigma factor selectivity. *J Bacteriol* **187:**1591-1603.
- 631 62. **Park SC, Pham BP, Van Duyet L, Jia B, Lee S, Yu R, Han SW, Yang JK, Hahm KS,**  
632 **Cheong GW.** 2008. Structural and functional characterization of osmotically inducible  
633 protein C (OsmC) from *Thermococcus kodakaraensis* KOD1. *Biochim Biophys Acta*  
634 **1784:** 783-788.
- 635 63. **Esquivel RN, Xu R, Pohlschroder M.** 2013. Novel archaeal adhesion pilins with a  
636 conserved N terminus. *J Bacteriol* **195:** 3808–3818.
- 637 64. **Losensky G, Vidakovic L, Klingl A, Pfeifer F, Fröls S.** 2015. Novel pili-like surface  
638 structures of *Halobacterium salinarum* strain R1 are crucial for surface adhesion. *Front*  
639 *Microbiol* **5:** 755.

- 640 65. **Jing H, Takagi J, Liu JH, Lindgren S, Zhang RG, Joachimiak A, Wang JH,**  
641 **Springer TA.** 2002. Archaeal surface layer proteins contain beta propeller, PKD, and  
642 beta helix domains and are related to metazoan cell surface proteins. *Structure* **10**:1453-  
643 1464.
- 644 66. **Makarova KS, Yutin N, Bell SD, Koonin EV.** 2010. Evolution of diverse cell division  
645 and vesicle formation systems in Archaea. *Nat Rev Microbiol* **8**: 731-741.
- 646 67. **Confalonieri F, Marsault J, Duguet M.** 1994. SAV, an archaeobacterial gene with  
647 extensive homology to a family of highly conserved eukaryotic ATPases. *J Mol Biol* **235**:  
648 396-401.
- 649 68. **Maeshima M.** 2000. Vacuolar H<sup>+</sup>-pyrophosphatase. *Biochim Biophys Acta* **1465**: 37–51
- 650 69. **Arutyunov D, Arenson B, Manchak J, Frost LS.** 2010. F plasmid TraF and TraH are  
651 components of an outer membrane complex involved in conjugation. *J Bacteriol* **192**:  
652 1730-1734.

653

654 **Supplementary material figure legends and list of tables**

655

656 **Fig. S1** Number of proteins detected for single filter samples. Metaproteomics were  
657 performed on a total of 15 filter samples, representing three distinct size fractions (0.1 – 0.8  
658 µm on 0.1 µm filters; 0.8 – 3 µm on 0.8 µm filters; 3 – 20 µm on 3 µm filters) from 5 distinct  
659 depths (0 m, 5 m, 13 m, 24 m, 36 m). Fewer proteins were detected from 0.1 µm filter  
660 samples compared to the larger size fraction due to a decrease in the amount of biomass.

661

662 **Fig. S2** Microscopy of Deep Lake water. The image depicts cells attached to particulate  
663 matter from surface water filtered through a 20 µm pre-filter prior to capture on a 3 µm filter.  
664 Magnification, 100 x; scale bar, 10 µm.

665

666 **Fig. S3** Taxonomic composition of the Deep Lake metaproteome. Relative abundance of taxa  
667 based on number of identified proteins (blue bars); normalized total spectrum counts (red  
668 bars); total number of proteins detected for each taxonomic category (numbers above blue  
669 bars).

670

671 **Fig. S4** Relative abundance of proteins within functional categories. **(A)** *Hht. litchfieldiae*;  
672 **(B)** DL31; **(C)** *Hrr. lacusprofundi*. Abundance calculated relative to the number of proteins  
673 for the respective organism (blue bars) or relative to the sum of the normalized total spectrum  
674 counts (red bars).

675

676 **Fig. S5** Growth response of *Hht. litchfieldiae* to defined substrates. **(A)**  
677 aminoethylphosphonate (AEP); **(B)** dihydroxyacetone (DHA); **(C)** starch.

678

679 **Table S1** Correlations mentioned in the main text.

680

681 **Table S2** Pearson correlation analyses performed in R using the normalized total spectrum  
682 count across the 15 Deep Lake samples.

683

684 **Table S3** Complete list of proteins identified in the Deep Lake metaproteome

685

686 **Table S4** Proteins involved in transport functions from the Deep Lake metaproteome with the  
687 best matches to *Hht. litchfieldiae*, DL31 and *Hrr. lacusprofundi*.

688

689 **Table S5** Proteins involved in carbohydrate uptake and metabolism from the Deep Lake  
690 metaproteome with the best matches to *Hht. litchfieldiae*.

691

692 **Table S6** Proteins involved in the uptake and metabolism of nitrogen sources from the Deep  
693 Lake metaproteome with the best matches to *Hht. litchfieldiae*, DL31 and *Hrr. lacusprofundi*.

694

695 **Table S7** Proteins involved in motility and taxis from the Deep Lake metaproteome with the  
696 best matches to *Hht. litchfieldiae*.

697

698 **Table S8** Proteins implicated in protection against and responses to oxidative stress,  
699 photolysis and UV irradiation detected in the Deep Lake metaproteome with the best matches  
700 to *Hht. litchfieldiae*, DL31 or *Hrr. lacusprofundi*.

701

702 **Table S9** Proteins assigned to *Hht. litchfieldiae* tADL-II.

703

704 **Table S10** Variant proteins detected for *Hht. litchfieldiae*, tADL, DL31 or *Hrr.*  
705 *lacusprofundi*.

706

707 **Table S11** Detected proteins with best matches to *Hht. litchfieldiae*, DL31 or *Hrr.*  
708 *lacusprofundi* encoded on contigs with neighbouring genes that best matched to other  
709 haloarchaeal species.

# Fig. S1

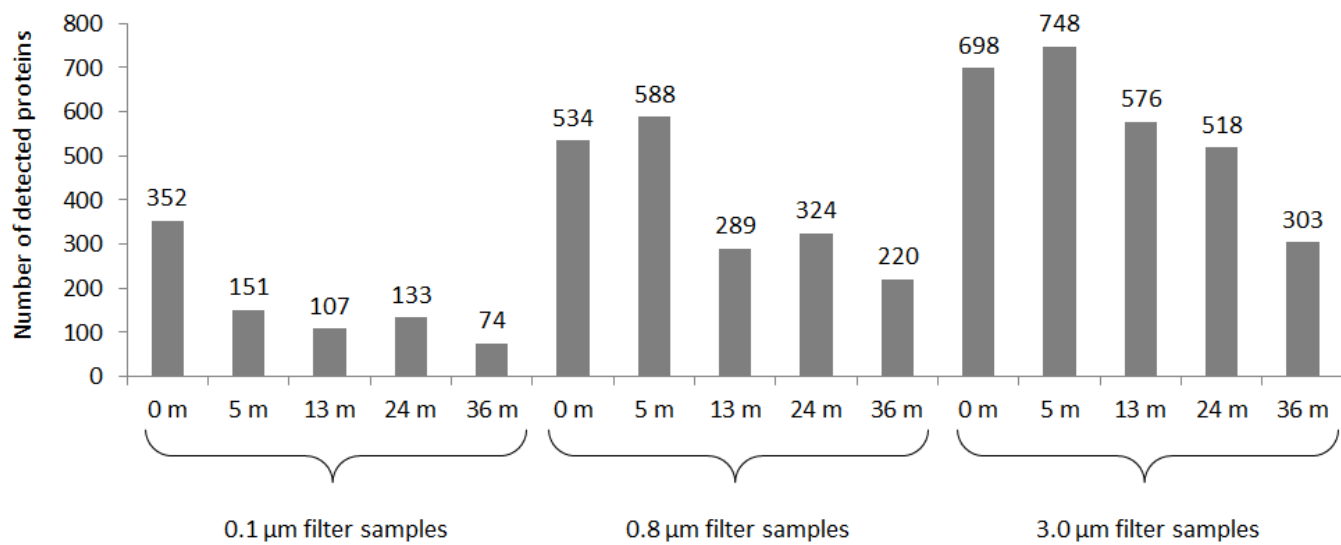

**Fig. S1** Number of proteins detected for single filter samples. Metaproteomics were performed on a total of 15 filter samples, representing three distinct size fractions (0.1 – 0.8  $\mu\text{m}$  on 0.1  $\mu\text{m}$  filters; 0.8 – 3  $\mu\text{m}$  on 0.8  $\mu\text{m}$  filters; 3 – 20  $\mu\text{m}$  on 3  $\mu\text{m}$  filters) from 5 distinct depths (0 m, 5 m, 13 m, 24 m, 36 m). Fewer proteins were detected from 0.1  $\mu\text{m}$  filter samples compared to the larger size fraction due to a decrease in the amount of biomass.

Fig. S2

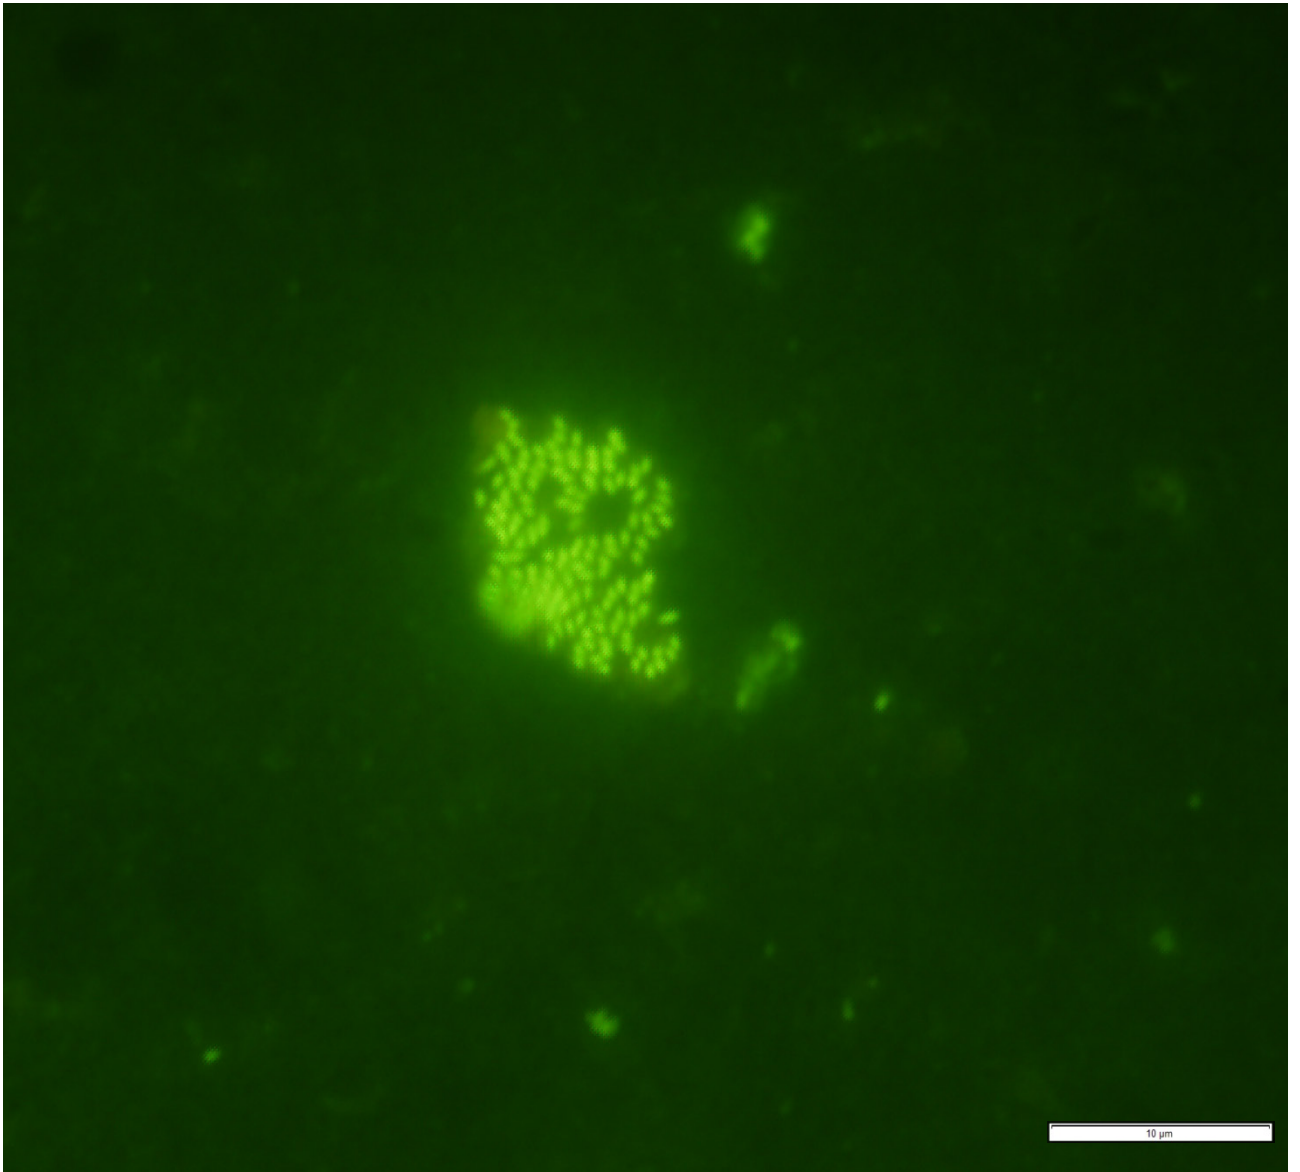



**Fig. S2** Microscopy of Deep Lake water. The image depicts cells attached to particulate matter from surface water filtered through a 20  $\mu\text{m}$  pre-filter prior to capture on a 3  $\mu\text{m}$  filter. Magnification, 100 x; scale bar, 10  $\mu\text{m}$ .

Fig. S3

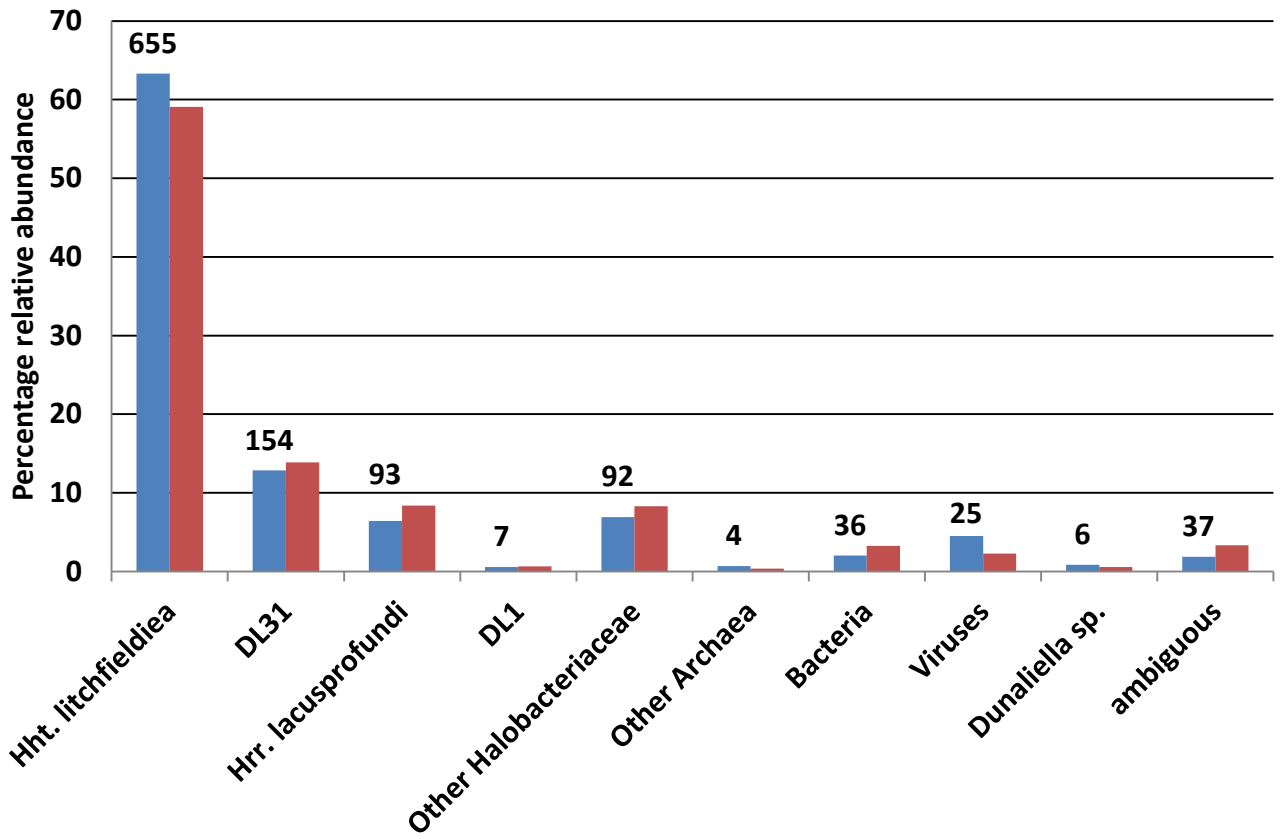

**Fig. S3** Taxonomic composition of the Deep Lake metaproteome. Relative abundance of taxa based on number of identified proteins (blue bars); normalized total spectrum counts (red bars); total number of proteins detected for each taxonomic category (numbers above blue bars).

# Fig. S4

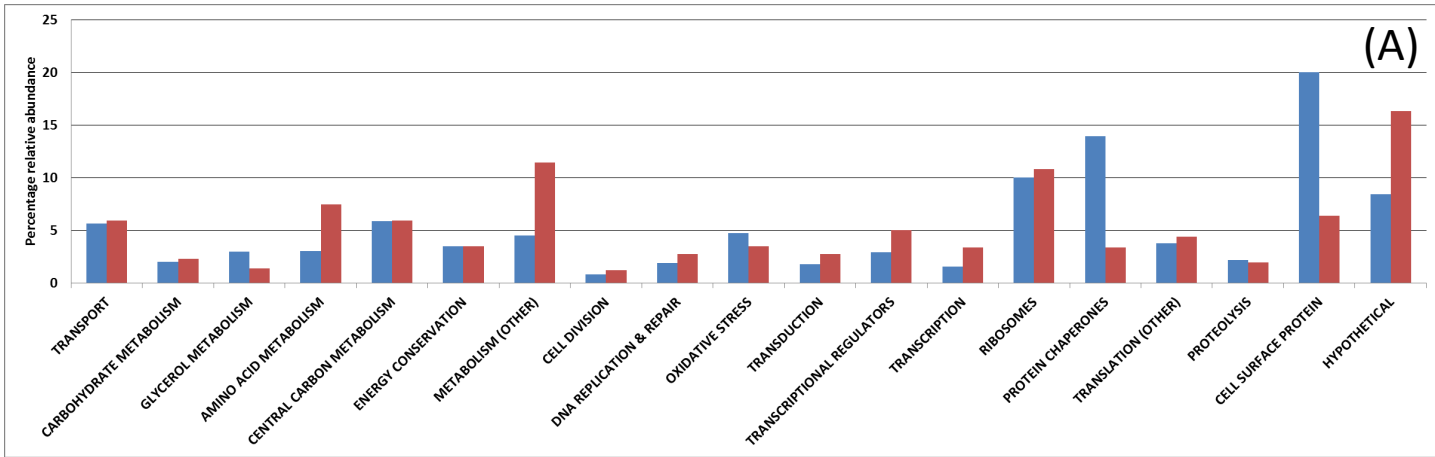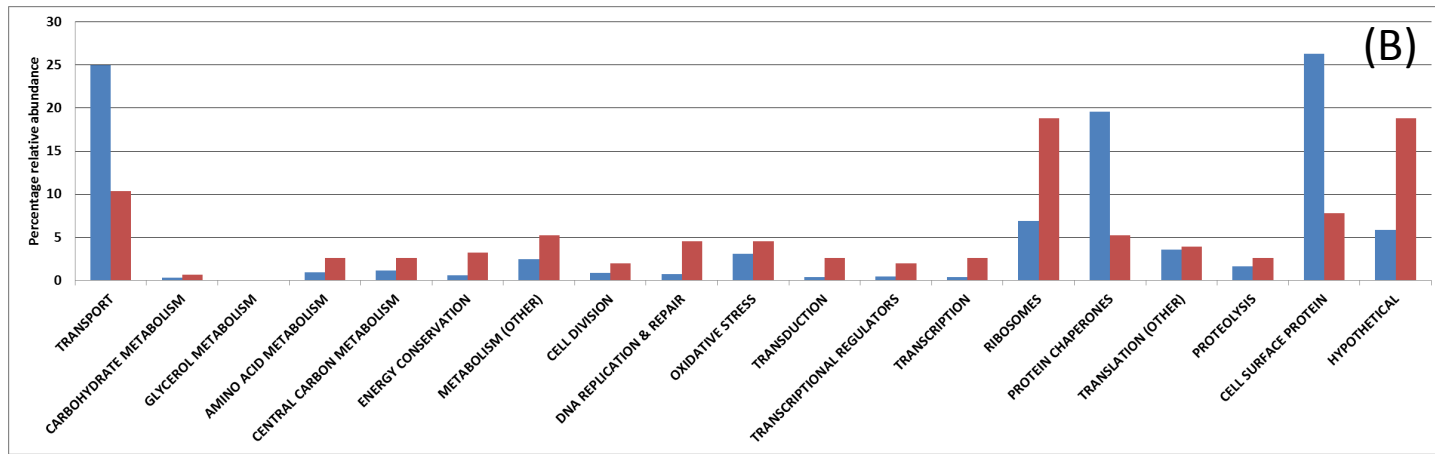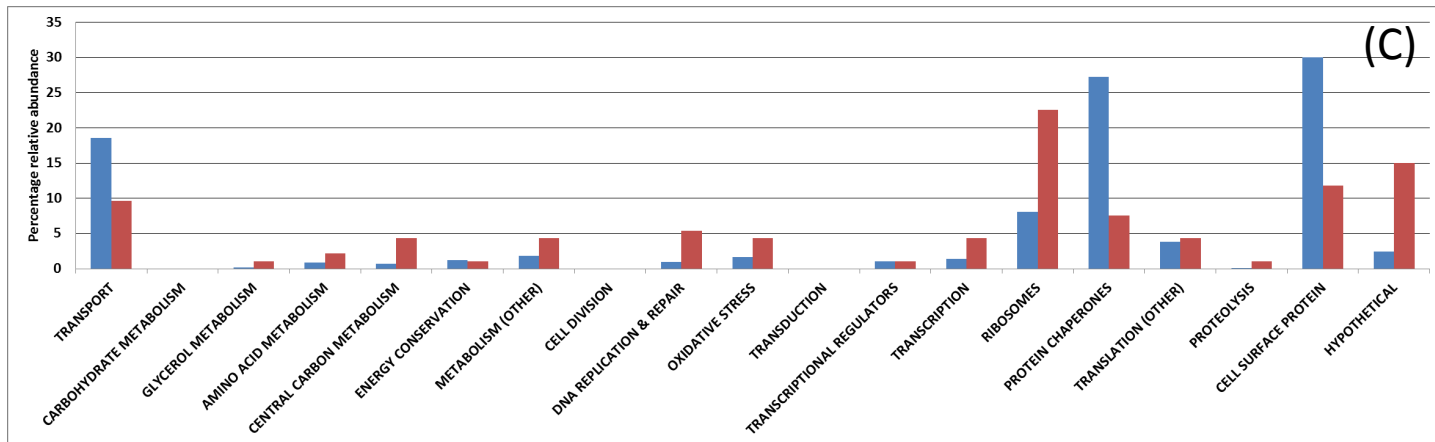

**Fig. S4** Relative abundance of proteins within functional categories. **(A)** *Hht. litchfieldiae*; **(B)** DL31; **(C)** *Hrr. lacusprofundi*. Abundance calculated relative to the number of proteins for the respective organism (blue bars) or relative to the sum of the normalized total spectrum counts (red bars).

Fig. S5

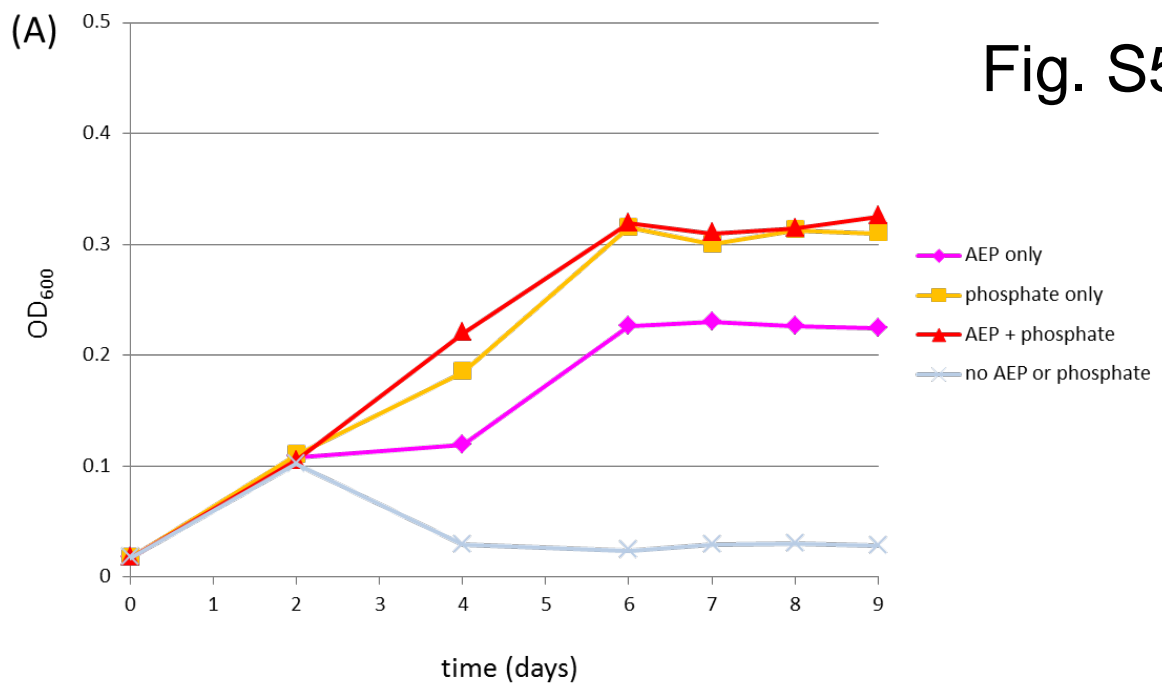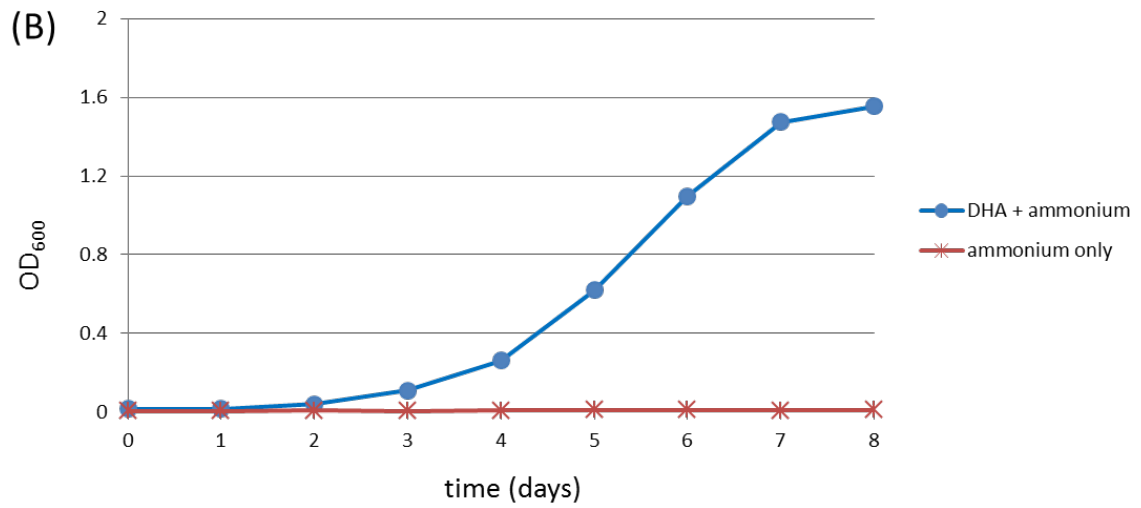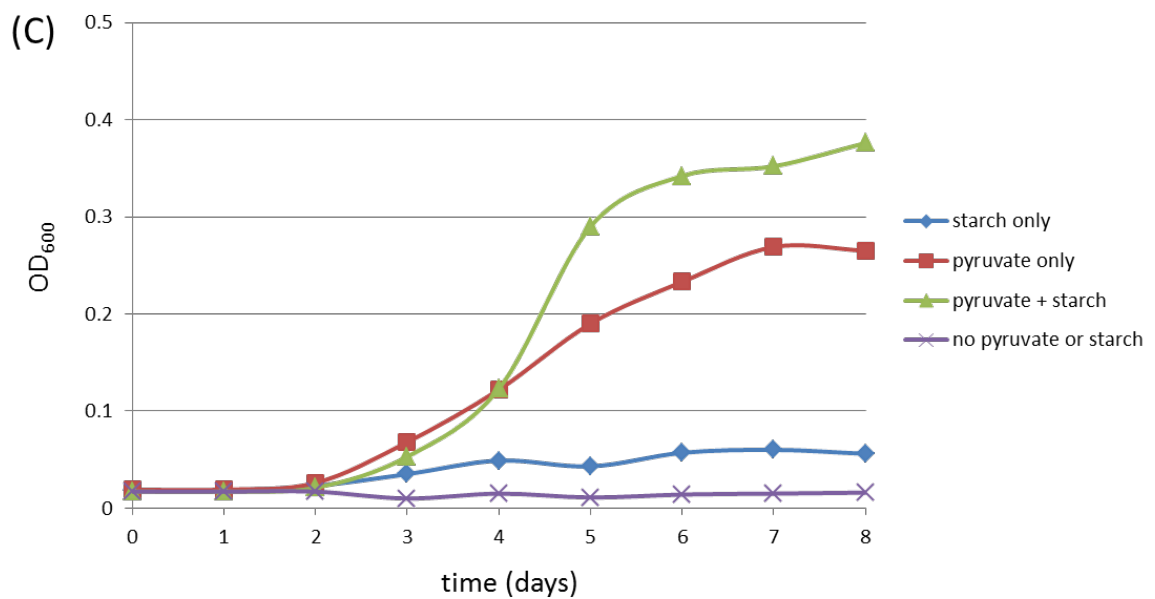

**Fig. S5** Growth response of *Hht. litchfieldiae* to defined substrates. **(A)** aminoethylphosphonate (AEP); **(B)** dihydroxyacetone (DHA); **(C)** starch.

**Table S1** Correlations mentioned in the current study. Fractionation of the Deep Lake biomass according to depth and filter size, comparing the abundances (measured in spectrum counts) of single proteins and proteins from functional categories. Statistically valid positive or negative correlations were determined between spectrum counts for proteins across the 15 filter samples. Pair-wise comparisons of spectrum counts were between individual abundant proteins, functional categories of proteins (the sum of the spectrum count for a functional group, such as tADL ABC transporter proteins) or taxonomic groups of proteins (for example all *Hht. litchfieldiae* tADL proteins vs all *Dunaliella* proteins). Only correlations with a p-value < 0.01 were regarded as statistically significant.. Positive correlations are shown in blue, negative correlations in red.

| <b>Correlation</b>                                                                                     | <b><i>r</i></b> |
|--------------------------------------------------------------------------------------------------------|-----------------|
| <b>Species/functional categories</b>                                                                   |                 |
| DL31 transport vs<br><i>Hrr. lacusprofundi</i> transport                                               | 0.96            |
| <i>Hht. litchfieldiae</i> transport vs<br>DL31 transport                                               | -0.91           |
| <i>Hht. litchfieldiae</i> transport vs<br><i>Hrr. lacusprofundi</i> transport                          | -0.89           |
| <b>Species/functional subcategories</b>                                                                |                 |
| <i>Hht. litchfieldiae</i> archaeellins vs<br><i>Hht. litchfieldiae</i> central carbon metabolism       | -0.95           |
| <i>Hht. litchfieldiae</i> archaeellins vs<br><i>Hht. litchfieldiae</i> ribosomes                       | -0.87           |
| DL31 ABC transporter – oligopeptides vs<br>DL31 ABC transporter – amino acids                          | 0.94            |
| DL31 ABC transporter – oligopeptides vs<br>DL31 ABC transporter – iron                                 | 0.89            |
| DL31 ABC transporter – amino acids vs<br>DL31 ABC transporter – iron                                   | 0.92            |
| DL31 ABC transporters – oligopeptides vs<br><i>Hrr. lacusprofundi</i> TRAP transporters                | 0.76            |
| DL31 ABC transporters – amino acids vs<br><i>Hrr. lacusprofundi</i> TRAP transporters                  | 0.80            |
| DL31 ABC transporters – oligopeptides vs<br><i>Hrr. lacusprofundi</i> ABC transporters - oligopeptides | 0.91            |
| DL31 ABC transporters – oligopeptides vs<br><i>Hrr. lacusprofundi</i> ABC transporters – amino acids   | 0.72            |



|                                                                                                                                       |      |
|---------------------------------------------------------------------------------------------------------------------------------------|------|
| DL31 ABC transporters – amino acids vs<br><i>Hrr. lacusprofundi</i> ABC transporters – amino acids                                    | 0.72 |
| DL31 ABC transporters – iron vs<br><i>Hrr. lacusprofundi</i> ABC transporters – oligopeptides                                         | 0.95 |
| DL31 ABC transporters – amino acids vs<br><i>Hrr. lacusprofundi</i> ABC transporters – oligopeptides                                  | 0.92 |
| DL31 ABC transporters – iron vs<br><i>Hrr. lacusprofundi</i> TRAP transporters                                                        | 0.84 |
| <i>Hrr. lacusprofundi</i> TRAP transporters vs<br><i>Hrr. lacusprofundi</i> ABC transporters – oligopeptides                          | 0.90 |
| <b>Individual proteins</b>                                                                                                            |      |
| <i>Hht. litchfieldiae</i> archaellin halTADL_1544 (protein #1) vs<br><i>Hht. litchfieldiae</i> archaellin halTADL_1812 (protein #3)   | 0.88 |
| <i>Hht. litchfieldiae</i> archaellin halTADL_1544 (protein #1) vs<br><i>Hht. litchfieldiae</i> archaellin halTADL_1813 (protein #7)   | 0.85 |
| <i>Hht. litchfieldiae</i> archaellin halTADL_1544 (protein #1) vs<br><i>Hht. litchfieldiae</i> archaellin halTADL_1810 (protein #21)  | 0.74 |
| <i>Hht. litchfieldiae</i> archaellin halTADL_1544 (protein #1) vs<br><i>Hht. litchfieldiae</i> archaellin halTADL_1811 (protein #80)  | 0.95 |
| <i>Hht. litchfieldiae</i> archaellin halTADL_1544 (protein #1) vs<br><i>Hht. litchfieldiae</i> archaellin halTADL_0078 (protein #95)  | 0.96 |
| <i>Hht. litchfieldiae</i> archaellin halTADL_1812 (protein #3) vs<br><i>Hht. litchfieldiae</i> archaellin halTADL_1813 (protein #7)   | 0.97 |
| <i>Hht. litchfieldiae</i> archaellin halTADL_1812 (protein #3) vs<br><i>Hht. litchfieldiae</i> archaellin halTADL_1813 (protein #12)  | 0.90 |
| <i>Hht. litchfieldiae</i> archaellin halTADL_1812 (protein #3) vs<br><i>Hht. litchfieldiae</i> archaellin halTADL_1810 (protein #21)  | 0.85 |
| <i>Hht. litchfieldiae</i> archaellin halTADL_1812 (protein #3) vs<br><i>Hht. litchfieldiae</i> archaellin halTADL_1811 (protein #80)  | 0.89 |
| <i>Hht. litchfieldiae</i> archaellin halTADL_1812 (protein #3) vs<br><i>Hht. litchfieldiae</i> archaellin halTADL_0078 (protein #95)  | 0.89 |
| <i>Hht. litchfieldiae</i> archaellin halTADL_1812 (protein #3) vs<br><i>Hht. litchfieldiae</i> archaellin halTADL_0078 (protein #118) | 0.78 |
| <i>Hht. litchfieldiae</i> archaellin halTADL_1812 (protein #59) vs<br><i>Hht. litchfieldiae</i> archaellin halTADL_1810 (protein #21) | 0.82 |

|                                                                                                                                               |      |
|-----------------------------------------------------------------------------------------------------------------------------------------------|------|
| <i>Hht. litchfieldiae</i> archaellin halTADL_1813 (protein #7) vs<br><i>Hht. litchfieldiae</i> archaellin halTADL_1813 (protein #12)          | 0.91 |
| <i>Hht. litchfieldiae</i> archaellin halTADL_1813 (protein #7) vs<br><i>Hht. litchfieldiae</i> archaellin halTADL_1810 (protein #21)          | 0.92 |
| <i>Hht. litchfieldiae</i> archaellin halTADL_1813 (protein #7) vs<br><i>Hht. litchfieldiae</i> archaellin halTADL_1811 (protein #80)          | 0.82 |
| <i>Hht. litchfieldiae</i> archaellin halTADL_1813 (protein #7) vs<br><i>Hht. litchfieldiae</i> archaellin halTADL_0078 (protein #95)          | 0.84 |
| <i>Hht. litchfieldiae</i> archaellin halTADL_1813 (protein #7) vs<br><i>Hht. litchfieldiae</i> archaellin halTADL_0078 (protein #118)         | 0.77 |
| <i>Hht. litchfieldiae</i> archaellin halTADL_1813 (protein #12) vs<br><i>Hht. litchfieldiae</i> archaellin halTADL_1810 (protein #21)         | 0.92 |
| <i>Hht. litchfieldiae</i> archaellin halTADL_1813 (protein #12) vs<br><i>Hht. litchfieldiae</i> archaellin halTADL_0078 (protein #118)        | 0.94 |
| <i>Hht. litchfieldiae</i> archaellin halTADL_1810 (protein #21) vs<br><i>Hht. litchfieldiae</i> archaellin halTADL_0078 (protein #118)        | 0.85 |
| DL31 ABC transporter lipoprotein – oligopeptides Halar_2016 (Protein #9) vs<br>DL31 MmpL family membrane transporter Halar_1791 (Protein #29) | 0.76 |
| DL31 ABC transporter lipoprotein – iron Halar_0820 (Protein #33) vs<br>DL31 MmpL family membrane transporter Halar_1791 (Protein #29)         | 0.74 |
| <i>Hht. litchfieldiae</i> archaellin halTADL_1544 (protein #1) vs<br><i>Hht. litchfieldiae</i> $\alpha$ -amylase halTADL_0142 (Protein #65)   | 0.86 |
| <i>Hht. litchfieldiae</i> archaellin halTADL_1812 (protein #3) vs<br><i>Hht. litchfieldiae</i> $\alpha$ -amylase halTADL_0142 (Protein #65)   | 0.75 |
| <i>Hht. litchfieldiae</i> archaellin halTADL_1813 (protein #7) vs<br><i>Hht. litchfieldiae</i> $\alpha$ -amylase halTADL_0142 (Protein #65)   | 0.69 |
| <i>Hht. litchfieldiae</i> archaellin halTADL_1811 (protein #80) vs<br><i>Hht. litchfieldiae</i> $\alpha$ -amylase halTADL_0142 (Protein #65)  | 0.86 |
| <i>Hht. litchfieldiae</i> archaellin halTADL_0078 (protein #95) vs<br><i>Hht. litchfieldiae</i> $\alpha$ -amylase halTADL_0142 (Protein #65)  | 0.90 |
| <b>Species</b>                                                                                                                                |      |
| <i>Hht. litchfieldiae</i> vs <i>Dunaliella</i>                                                                                                | 0.68 |

**Table S4** Proteins with transport functions from the Deep Lake metaproteome with the best matches to *Hht. litchfieldiae*, DL31 and *Hrr. lacusprofundi*. Protein numbers are given according to Table S3 (ranked by the sum of the normalized total spectrum count). Sequence identity refers to the amino acid sequence identity of the detected protein to its best match (column denoted “Locus tag”) in a BLASTP search. Spectrum count shows the sum of the normalized total spectrum count across all 15 samples. ‘nd’ denotes ‘not determined’ due to peptides matching to a protein family (i.e. more than one possible source protein; see Supplementary Information, Materials and Methods). \* Denotes a truncated protein.

| Protein annotation                                               | Protein # | Locus tag    | Sequence identity (%) | Spectrum count |
|------------------------------------------------------------------|-----------|--------------|-----------------------|----------------|
| <b><i>Hht. litchfieldiae</i></b>                                 |           |              |                       |                |
| <b>Phosphate uptake</b>                                          |           |              |                       |                |
| phosphate ABC transporter solute-binding protein (PstS)          | 13        | halTADL_2155 | 99                    | 235            |
| phosphate ABC transporter solute-binding protein (PstS)          | 61        | halTADL_2155 | 88                    | 92             |
| phosphate ABC transporter solute-binding protein (PstS)          | 75        | halTADL_2155 | 93                    | 82             |
| phosphate ABC transporter ATPase (PstB)                          | 517       | halTADL_2152 | 100                   | 7.6            |
| phosphate ABC transporter solute-binding protein (PstS)          | 85        | halTADL_1182 | 51                    | 71             |
| <b>Phosphonate uptake</b>                                        |           |              |                       |                |
| phosphonate ABC transporter solute-binding protein (PhnD)        | 347       | halTADL_1334 | 100                   | 16             |
| <b>Carbohydrate uptake</b>                                       |           |              |                       |                |
| carbohydrate ABC transporter solute-binding lipoprotein          | 265       | halTADL_2357 | 100                   | 25             |
| carbohydrate ABC transporter solute-binding lipoprotein          | 269       | halTADL_2761 | 100                   | 24             |
| carbohydrate ABC transporter solute-binding lipoprotein          | 702       | halTADL_1911 | 100                   | 3.2            |
| carbohydrate ABC transporter solute-binding lipoprotein          | 247       | halTADL_2761 | 84                    | 26             |
| carbohydrate ABC transporter ATPase                              | 1099      | halTADL_2764 | 88                    | 0.4            |
| <b>Amino acid uptake</b>                                         |           |              |                       |                |
| branched-chain amino acid ABC transporter solute-binding protein | 373       | halTADL_2916 | 100                   | 14             |
| branched-chain amino acid ABC transporter solute-binding protein | 202       | halTADL_2916 | 88                    | 33             |
| polar amino acid ABC transporter solute-binding protein          | 486       | halTADL_0024 | 100                   | 8.5            |
| <b>Ammonium uptake</b>                                           |           |              |                       |                |
| ammonium permease (ammonium transporter) (Amt)                   | 220       | halTADL_1826 | 100                   | 30             |
| <b>Urea uptake</b>                                               |           |              |                       |                |
| urea ABC transporter solute-binding protein                      | 617       | halTADL_0628 | 100                   | 4.8            |
| <b>Iron uptake</b>                                               |           |              |                       |                |
| iron ABC transporter solute-binding protein                      | 159       | halTADL_1788 | 100                   | 40.9           |
| iron ABC transporter solute-binding protein                      | 856       | halTADL_1788 | 83                    | 1.6            |

| <b>Cation transport</b>                                                             |      |                                            |     |      |
|-------------------------------------------------------------------------------------|------|--------------------------------------------|-----|------|
| K <sup>+</sup> uptake system, TrkA subunit                                          | 806  | halTADL_3061                               | 100 | 2.0  |
| K <sup>+</sup> uptake system, TrkA subunit                                          | 1048 | halTADL_3061                               | 89  | 0.6  |
| K <sup>+</sup> uptake system, TrkA subunit                                          | 287  | halTADL_3258                               | 100 | 21.2 |
| K <sup>+</sup> uptake system, TrkA subunit                                          | 854  | halTADL_2713                               | 100 | 1.6  |
| mechanosensitive ion channel (MscS)                                                 | 436  | halTADL_2994                               | 100 | 10.5 |
| <b>Secretion</b>                                                                    |      |                                            |     |      |
| signal peptide peptidase SppA                                                       | 282  | halTADL_2673                               | 100 | 22.0 |
| PilT protein: Type II/IV secretion system domain + KH domain protein                | 558  | halTADL_0825                               | 100 | 6.3  |
| SecD/SecF/SecDF export membrane protein                                             | 213  | halTADL_0787                               | 100 | 31.4 |
| signal recognition particle Srp54, secretory pathway                                | 500  | halTADL_2202                               | 100 | 7.9  |
| SecD/SecF/SecDF export membrane protein                                             | 722  | halTADL_0788                               | 100 | 3.0  |
| <b>TRAP/TTT transport</b>                                                           |      |                                            |     |      |
| Tripartite Tricarboxylate transporter (TTT), solute receptor                        | 138  | halTADL_0690                               | 100 | 45.2 |
| TRAP transporter solute receptor, TAXI family                                       | 299  | halTADL_0243                               | 100 | 19.8 |
| <b>Other transport</b>                                                              |      |                                            |     |      |
| thiamine ABC transporter, substrate-binding protein (ThiB)                          | 961  | halTADL_2794                               | 100 | 0.9  |
| nucleoside ABC transporter substrate-binding protein                                | 881  | halTADL_2623                               | nd  | 1.5  |
| nitrate/sulfonate/bicarbonate ABC transporter solute-binding protein                | 697  | No match<br>(encoded on<br>tADL-II contig) | -   | 3.3  |
| ABC-type antimicrobial peptide transport system, permease component                 | 492  | halTADL_1613                               | 100 | 8.1  |
| ABC-type antimicrobial peptide transport system, permease component                 | 693  | halTADL_1613                               | 88  | 3.4  |
| heavy metal-exporting ATPase (copper?)                                              | 782  | halTADL_1767                               | 100 | 2.3  |
| formate/nitrite transporter                                                         | 868  | halTADL_2501                               | 100 | 1.5  |
| phosphate/sulfate permease (PiT family)                                             | 837  | halTADL_3083                               | 100 | 1.7  |
| RND superfamily family / MMPL (mycobacterial membrane protein large) family protein | 957  | halTADL_0082                               | 100 | 0.9  |
| <b>DL31</b>                                                                         |      |                                            |     |      |
| <b>Phosphate uptake</b>                                                             |      |                                            |     |      |
| phosphate ABC transporter solute-binding protein (PstS)                             | 533  | Halar_1873                                 | 100 | 7.0  |
| <b>Oligopeptide uptake</b>                                                          |      |                                            |     |      |
| oligopeptide/dipeptide ABC transporter solute-binding protein                       | 9    | Halar_2016                                 | 100 | 277  |

|                                                                                                    |      |            |     |     |
|----------------------------------------------------------------------------------------------------|------|------------|-----|-----|
| oligopeptide/dipeptide ABC transporter solute-binding protein                                      | 76   | Halar_1439 | 100 | 82  |
| oligopeptide/dipeptide ABC transporter solute-binding protein                                      | 189  | Halar_0722 | 100 | 35  |
| oligopeptide/dipeptide ABC transporter solute-binding protein                                      | 255  | Halar_1146 | 100 | 26  |
| oligopeptide/dipeptide ABC transporter solute-binding protein                                      | 582  | Halar_1285 | 100 | 5.5 |
| oligopeptide/dipeptide ABC transporter solute-binding protein                                      | 654  | Halar_3436 | 100 | 4.1 |
| oligopeptide/dipeptide ABC transporter solute-binding protein                                      | 818  | Halar_2651 | 100 | 1.8 |
| oligopeptide/dipeptide ABC transporter solute-binding protein                                      | 879  | Halar_2024 | 100 | 1.5 |
| <b>Amino acid uptake</b>                                                                           |      |            |     |     |
| branched-chain amino acid ABC transporter solute-binding protein                                   | 158  | Halar_1569 | 100 | 41  |
| branched-chain amino acid ABC transporter solute-binding protein                                   | 187  | Halar_2890 | 100 | 36  |
| branched-chain amino acid ABC transporter solute-binding protein                                   | 192  | Halar_3433 | 100 | 35  |
| <b>Iron uptake</b>                                                                                 |      |            |     |     |
| iron ABC transporter solute-binding protein                                                        | 33   | Halar_0820 | 100 | 124 |
| iron ABC transporter solute-binding protein                                                        | 599  | Halar_1080 | 100 | 5.1 |
| <b>Other transport</b>                                                                             |      |            |     |     |
| membrane transporter: MMPL (mycobacterial membrane protein large) family protein / RND superfamily | 29   | Halar_1791 | 99  | 134 |
| uncharacterized transporter (export?), ATPase component                                            | 919  | Halar_1798 | 100 | 1.2 |
| <b><i>Hrr. lacusprofundi</i></b>                                                                   |      |            |     |     |
| <b>Phosphate uptake</b>                                                                            |      |            |     |     |
| phosphate ABC transporter solute-binding protein (PstS)                                            | 326  | Hlac_3551  | 100 | 17  |
| <b>Oligopeptide uptake</b>                                                                         |      |            |     |     |
| oligopeptide/dipeptide ABC transporter solute-binding protein                                      | 1058 | Hlac_0069  | 100 | 87  |
| oligopeptide/dipeptide ABC transporter solute-binding protein                                      | 630  | Hlac_0244  | 100 | 4.5 |
| <b>Amino acid uptake</b>                                                                           |      |            |     |     |
| branched-chain amino acid ABC transporter solute-binding protein*                                  | 160  | Hlac_2093  | 100 | 41  |
| polar amino acid ABC transporter solute-binding protein                                            | 891  | Hlac_1804  | 100 | 1.4 |
| <b>Iron uptake</b>                                                                                 |      |            |     |     |
| iron ABC transporter solute-binding protein                                                        | 663  | Hlac_0162  | 100 | 3.9 |
| <b>TRAP/TTT transport</b>                                                                          |      |            |     |     |
| TRAP transporter solute receptor, TAXI family                                                      | 56   | Hlac_2586  | 100 | 97  |
| TRAP transporter solute receptor, TAXI family                                                      | 144  | Hlac_2329  | 100 | 44  |

| <b>Other transport</b>                            |     |           |     |     |
|---------------------------------------------------|-----|-----------|-----|-----|
| nucleoside ABC transporter solute-binding protein | 496 | Hlac_1417 | 100 | 8.0 |

**Table S5** Proteins involved in carbohydrate uptake and metabolism from the Deep Lake metaproteome with the best matches to *Hht. litchfieldiae*. Protein numbers are given according to Table S3 (ranked by the sum of the normalized total spectrum count). Sequence identity refers to the amino acid sequence identity of the detected protein to its best match (column denoted “Locus tag”) in a BLASTP search. Spectrum count shows the sum of the normalized total spectrum count across all 15 samples. \*Denotes a match to a protein that is represented by an incomplete (truncated) gene on contig.

| Protein annotation                                                               | Protein # | Locus tag    | Sequence identity (%) | Spectrum count |
|----------------------------------------------------------------------------------|-----------|--------------|-----------------------|----------------|
| <b>Carbohydrate uptake</b>                                                       |           |              |                       |                |
| carbohydrate ABC transporter solute-binding lipoprotein                          | 265       | halTADL_2357 | 100                   | 25             |
| carbohydrate ABC transporter solute-binding lipoprotein                          | 269       | halTADL_2761 | 100                   | 24             |
| carbohydrate ABC transporter solute-binding lipoprotein                          | 702       | halTADL_1911 | 100                   | 3.2            |
| carbohydrate ABC transporter solute-binding lipoprotein                          | 247       | halTADL_2761 | 84                    | 26             |
| carbohydrate ABC transporter ATPase                                              | 1099      | halTADL_2764 | 88                    | 0.4            |
| <b>Polysaccharide/starch degradation</b>                                         |           |              |                       |                |
| $\alpha$ -amylase (glycosyl hydrolase, family 13)                                | 65        | halTADL_0142 | 100                   | 90             |
| $\alpha$ -amylase (glycosyl hydrolase, family 13)                                | 193       | halTADL_0142 | 84                    | 35             |
| $\alpha$ -amylase (glycosyl hydrolase, family 13)                                | 543       | halTADL_0142 | 94                    | 6.8            |
| glucan 1,4- $\alpha$ -glucosidase (glucoamylase) (glycosyl hydrolase, family 15) | 557       | halTADL_0141 | 100                   | 6.4            |
| 4- $\alpha$ -glucanotransferase (amylomaltase) (glycosyl hydrolase, family 77)   | 710       | halTADL_2529 | 100                   | 3.1            |
| <b>Glycerol catabolism</b>                                                       |           |              |                       |                |
| glycerol kinase (GlpK)                                                           | 17        | halTADL_2249 | 100                   | 206            |
| glycerol kinase (GlpK)                                                           | 28        | halTADL_2249 | 96                    | 13             |
| glycerol kinase (GlpK)                                                           | 459       | halTADL_0681 | 100                   | 135            |
| glycerol kinase (GlpK)*                                                          | 381       | halTADL_0681 | 100                   | 9.5            |
| glycerol-3-phosphate dehydrogenase (GlpA)                                        | 195       | halTADL_2244 | 100                   | 34             |
| glycerol-3-phosphate dehydrogenase (GlpA)                                        | 327       | halTADL_2244 | 87                    | 17             |
| dihydroxyacetone (DHA) kinase, L subunit (DhaL)                                  | 266       | halTADL_2259 | 100                   | 25             |
| dihydroxyacetone (DHA) kinase, L subunit (DhaL)                                  | 982       | halTADL_2259 | 92                    | 0.9            |
| dihydroxyacetone (DHA) kinase, K subunit (DhaK)                                  | 140       | halTADL_2260 | 94                    | 45             |
| <b>Glycosylation / Capsular polysaccharide</b>                                   |           |              |                       |                |
| glucose-1-phosphate thymidyltransferase (RfbA, RffH)                             | 37        | halTADL_3353 | 100                   | 118            |
| glucose-1-phosphate thymidyltransferase (RfbA, RffH)                             | 421       | halTADL_3353 | 93                    | 11             |

|                                                                                         |      |              |     |     |
|-----------------------------------------------------------------------------------------|------|--------------|-----|-----|
| glycosyl transferase group 1 (possible $\alpha$ -D-glucan synthase)                     | 780  | halTADL_2565 | 100 | 2.3 |
| nucleoside-diphosphate-sugar epimerase                                                  | 497  | halTADL_3057 | 100 | 8.0 |
| NUDIX hydrolase (NUDIX = NUcleoside DIphosphate linked to some other moiety X)          | 1097 | halTADL_2550 | 100 | 0.4 |
| NUDIX hydrolase (NUDIX = NUcleoside DIphosphate linked to some other moiety X)          | 1053 | halTADL_3253 | 100 | 0.6 |
| oligosaccharyltransferase AglB                                                          | 540  | halTADL_2411 | 100 | 6.8 |
| <b>Carbohydrate metabolism (other)</b>                                                  |      |              |     |     |
| carbohydrate kinase, FGGY (possible xylulokinase [XylB])                                | 1041 | halTADL_2660 | 100 | 0.6 |
| phosphoglucomutase/phosphomannomutase                                                   | 181  | halTADL_1712 | 100 | 36  |
| ribose 5-phosphate isomerase A (RpiA)                                                   | 1012 | halTADL_1707 | 100 | 0.6 |
| <b>Emden-Meyerhof (EM) pathway</b>                                                      |      |              |     |     |
| phosphoglucose isomerase                                                                | 528  | halTADL_0801 | 100 | 7.2 |
| 2-dehydro-3-deoxy-D-gluconate (KDG) kinase (ribokinase family) (KdgK)                   | 1038 | halTADL_2089 | 100 | 0.6 |
| fructose-1,6-bisphosphate aldolase, class I (FbaB)                                      | 171  | halTADL_0575 | 100 | 39  |
| fructose-1,6-bisphosphate aldolase, class I (FbaB)                                      | 733  | halTADL_0575 | 92  | 2.8 |
| fructose 1,6-bisphosphate aldolase (multifunctional)                                    | 225  | halTADL_3234 | 100 | 29  |
| fructose 1,6-bisphosphate aldolase (multifunctional)                                    | 420  | halTADL_3234 | 96  | 11  |
| fructose-1,6-bisphosphate aldolase, class II (FbaA)                                     | 845  | halTADL_3223 | 100 | 1.6 |
| triosephosphate isomerase (TpiA)                                                        | 175  | halTADL_2532 | 100 | 37  |
| triosephosphate isomerase (TpiA)                                                        | 249  | halTADL_2532 | 89  | 26  |
| <b>Entner-Doudoroff (ED) Pathway (semiphosphorylative)</b>                              |      |              |     |     |
| gluconate dehydratase (GnaD)                                                            | 216  | halTADL_0374 | 100 | 31  |
| 2-dehydro-3-deoxy-D-gluconate (KDG) kinase (ribokinase family) (KdgK)                   | 1038 | halTADL_2089 | 100 | 0.6 |
| 2-dehydro-3-deoxyphosphogluconate (KDPG) aldolase (Eda)                                 | 355  | halTADL_0882 | 100 | 15  |
| <b>ED/EM common pathway</b>                                                             |      |              |     |     |
| glyceraldehyde-3-phosphate dehydrogenase (NAD(P) <sup>+</sup> -dependent), type I (Gap) | 110  | halTADL_0817 | 100 | 54  |
| glyceraldehyde-3-phosphate dehydrogenase (NAD(P) <sup>+</sup> -dependent), type I (Gap) | 591  | halTADL_0817 | 90  | 5.2 |
| phosphoglycerate kinase (Pgc)                                                           | 272  | halTADL_0816 | 100 | 24  |
| phosphoglycerate kinase (Pgc)                                                           | 833  | halTADL_0816 | 94  | 1.7 |
| enolase (phosphopyruvate hydratase) (Eno)                                               | 25   | halTADL_2780 | 100 | 142 |
| enolase (phosphopyruvate hydratase) (Eno)                                               | 391  | halTADL_2780 | 90  | 12  |
| pyruvate kinase (Pyk)                                                                   | 334  | halTADL_3014 | 100 | 17  |



|                                          |     |              |    |     |
|------------------------------------------|-----|--------------|----|-----|
| pyruvate kinase (Pyk)                    | 695 | halTADL_3014 | 91 | 3.4 |
| <b>Gluconeogenesis</b>                   |     |              |    |     |
| phosphoenolpyruvate (PEP) synthase (Pps) | 451 | halTADL_1011 | 79 | 9.8 |

**Table S6** Proteins involved in the uptake and metabolism of nitrogen sources from the Deep Lake metaproteome with the best matches to *Hht. litchfieldiae*, DL31, and *Hrr. lacusprofundi*. Protein numbers are given according to Table S3 (ranked by the sum of the normalized total spectrum count). Sequence identity refers to the amino acid sequence identity of the detected protein to its best match (column denoted “Locus tag”) in a BLASTP search. Spectrum count shows the sum of the normalized total spectrum count across all 15 samples. ‘nd’ denotes ‘not determined’ due to peptides matching to a protein family (i.e. more than one possible source protein; see Supplementary Information, Materials and Methods).

| Protein annotation                                                                   | Protein # | Locus tag    | Sequence identity (%) | Spectrum count |
|--------------------------------------------------------------------------------------|-----------|--------------|-----------------------|----------------|
| <b><i>Hht. litchfieldiae</i></b>                                                     |           |              |                       |                |
| <b>Protein/peptide digestion (extracytoplasmic)</b>                                  |           |              |                       |                |
| halolysin (peptidase S8 and S53 subtilisin kexin sedolisin)                          | 477       | halTADL_1514 | 100                   | 8.7            |
| aminopeptidase (peptidase family M42)                                                | 723       | halTADL_0101 | nd                    | 3.0            |
| <b>Amino acid uptake</b>                                                             |           |              |                       |                |
| branched-chain amino acid ABC transporter solute-binding protein                     | 373       | halTADL_2916 | 100                   | 14             |
| branched-chain amino acid ABC transporter solute-binding protein                     | 202       | halTADL_2916 | 88                    | 33             |
| polar amino acid ABC transporter solute-binding protein                              | 486       | halTADL_0024 | 100                   | 8.5            |
| <b>Ammonium uptake &amp; assimilation</b>                                            |           |              |                       |                |
| ammonium permease (ammonium transporter) (Amt)                                       | 220       | halTADL_1826 | 100                   | 30             |
| glutamine synthetase (GlnA) → Gln                                                    | 88        | halTADL_3423 | 100                   | 67             |
| glutamate synthase (GltB) → Glu                                                      | 760       | halTADL_0125 | 100                   | 2.5            |
| <b>Amino acid biosynthesis</b>                                                       |           |              |                       |                |
| aspartate aminotransferase (AspB) → Asp, Phe                                         | 1086      | halTADL_0403 | 100                   | 0.4            |
| aspartate aminotransferase (AspB) → Asp, Phe                                         | 173       | halTADL_3081 | 100                   | 38             |
| aspartate aminotransferase (AspB) → Asp, Phe                                         | 619       | halTADL_3081 | 97                    | 4.8            |
| carbamoyl-phosphate synthase, large subunit (CarB) → Arg                             | 469       | halTADL_0988 | 100                   | 9.1            |
| aspartate kinase (LysC) → Lys, Thr, Met                                              | 527       | halTADL_1916 | 100                   | 7.3            |
| aspartate kinase (LysC) → Lys, Thr, Met                                              | 905       | halTADL_1916 | 90                    | 1.3            |
| aspartate-semialdehyde dehydrogenase (Asd) → Lys, Thr, Met                           | 642       | halTADL_0714 | 100                   | 4.3            |
| homoserine dehydrogenase (MetL) → Lys, Thr, Met                                      | 430       | halTADL_0649 | 100                   | 11             |
| threonine synthase (ThrC) → Thr                                                      | 655       | halTADL_2266 | 97                    | 4.0            |
| cystathionine gamma-synthase (MetB) or O-acetylhomoserine (thiol)-lyase (MetY) → Met | 553       | halTADL_1890 | 100                   | 6.5            |

|                                                                                      |      |              |     |     |
|--------------------------------------------------------------------------------------|------|--------------|-----|-----|
| 5-methyltetrahydropteroyltriglutamate -homocysteine methyltransferase (MetE) → Met   | 487  | halTADL_0179 | 100 | 8.4 |
| 2,3,4,5-tetrahydropyridine-2-carboxylate N-succinyltransferase (DapD) → Lys          | 402  | halTADL_0281 | nd  | 12  |
| glutamate-5-semialdehyde dehydrogenase (ProA) → Pro                                  | 600  | halTADL_2358 | nd  | 5.1 |
| pyrroline-5-carboxylate reductase (ProC) → Pro                                       | 588  | halTADL_2360 | 100 | 5.3 |
| ATP phosphoribosyltransferase (HisG) → His                                           | 602  | halTADL_1729 | 100 | 5.1 |
| phosphoribosylformimino-5-aminoimidazole carboxamide ribotide isomerase (HisA) → His | 787  | halTADL_1799 | 100 | 2.2 |
| imidazoleglycerol-phosphate dehydratase (HisB) → His                                 | 442  | halTADL_1797 | 100 | 10  |
| phosphoserine phosphatase (SerB) → Ser                                               | 590  | halTADL_1053 | 100 | 5.3 |
| phosphoserine phosphatase (SerB) → Ser                                               | 309  | halTADL_2046 | 96  | 19  |
| D-3-phosphoglycerate dehydrogenase (Ser A) → Ser                                     | 131  | halTADL_2045 | 100 | 47  |
| D-3-phosphoglycerate dehydrogenase (Ser A) → Ser                                     | 236  | halTADL_2045 | 93  | 28  |
| D-3-phosphoglycerate dehydrogenase (Ser A) → Ser                                     | 626  | halTADL_0712 | 100 | 4.6 |
| glycine hydroxymethyltransferase (GlyA) → Gly                                        | 501  | halTADL_3114 | nd  | 7.9 |
| rhodanese-like protein / thiosulfate sulfurtransferase → Cys?                        | 83   | halTADL_2750 | 100 | 74  |
| rhodanese-like protein / thiosulfate sulfurtransferase → Cys?                        | 258  | halTADL_2750 | 92  | 25  |
| fructose 1,6-bisphosphate aldolase (multifunctional) → Trp, Phe, Tyr                 | 225  | halTADL_3234 | 100 | 29  |
| fructose 1,6-bisphosphate aldolase (multifunctional) → Trp, Phe, Tyr                 | 420  | halTADL_3234 | 96  | 11  |
| 2-amino-3,7-dideoxy-D-threo-hept-6-ulosonate synthase → Trp, Phe, Tyr                | 171  | halTADL_0575 | 100 | 39  |
| 2-amino-3,7-dideoxy-D-threo-hept-6-ulosonate synthase → Trp, Phe, Tyr                | 733  | halTADL_0575 | 92  | 2.8 |
| dehydroquininate synthase II → Trp, Phe, Tyr                                         | 408  | halTADL_0574 | 100 | 12  |
| shikimate kinase (AroB) → Trp, Phe, Tyr                                              | 984  | halTADL_2582 | 100 | 0.9 |
| tryptophan synthase, alpha subunit (TrpA) → Trp                                      | 888  | halTADL_0576 | nd  | 1.5 |
| anthranilate phosphoribosyltransferase (TrpD) → Trp                                  | 390  | halTADL_0889 | 100 | 13  |
| anthranilate phosphoribosyltransferase (TrpD) → Trp                                  | 290  | halTADL_3066 | 100 | 21  |
| anthranilate phosphoribosyltransferase (TrpD) → Trp                                  | 1049 | halTADL_3066 | 92  | 0.6 |
| prephenate dehydratase (PheA2) → Phe                                                 | 701  | halTADL_2073 | 100 | 3.3 |
| branched-chain amino acid aminotransferase (IlvE) → Leu, Val, Ile                    | 841  | halTADL_1961 | nd  | 1.6 |
| 3-isopropylmalate dehydrogenase (LeuB) → Leu                                         | 385  | halTADL_0366 | 100 | 13  |
| 3-isopropylmalate dehydrogenase (LeuB) → Leu                                         | 1084 | halTADL_0366 | 93  | 0.4 |

|                                                                                   |      |              |     |       |
|-----------------------------------------------------------------------------------|------|--------------|-----|-------|
| 3-isopropylmalate/(R)-2-methylmalate dehydratase, large subunit (LeuC) → Leu, Ile | 890  | halTADL_0364 | nd  | 1.4   |
| 3-isopropylmalate/(R)-2-methylmalate dehydratase, small subunit (LeuD) → Leu, Ile | 894  | halTADL_0365 | nd  | 1.4   |
| acetolactate synthase, small subunit (IlvH) → Ile, Val                            | 560  | halTADL_0361 | 100 | 6.3   |
| ketol-acid reductoisomerase (IlvC) → Ile, Val                                     | 251  | halTADL_0362 | 100 | 26    |
| dihydroxy-acid dehydratase (IlvD) → Ile, Val                                      | 323  | halTADL_2417 | nd  | 18    |
| 2-isopropylmalate synthase (LeuA) → Leu                                           | 729  | halTADL_0359 | 100 | 2.9   |
| citramalate synthase (CimA) → Ile                                                 | 605  | halTADL_1156 | 100 | 5.0   |
| <b>Amino acid degradation</b>                                                     |      |              |     |       |
| glutamate dehydrogenase (GdhA) ← Glu                                              | 1013 | halTADL_1757 | 81  | 0.6   |
| S-adenosylmethionine synthetase (Mat) ← Met                                       | 458  | halTADL_3028 | 100 | 9.5   |
| S-adenosylhomocysteine hydrolase (AchY) ← Met                                     | 826  | halTADL_1723 | 100 | 1.8   |
| 2-oxoacid dehydrogenase complex, E2 component ← Leu, Val, Ile                     | 631  | halTADL_2147 | 100 | 4.5   |
| 2-oxoacid dehydrogenase complex, dihydrolipoamide dehydrogenase ← Leu, Val, Ile   | 679  | halTADL_2144 | 100 | 3.6   |
| <b>Urea uptake &amp; degradation</b>                                              |      |              |     |       |
| urea ABC transporter solute-binding protein                                       | 617  | halTADL_0628 | 100 | 4.8   |
| urease, beta subunit (UreB)                                                       | 1089 | halTADL_0634 | nd  | 0.4   |
| <b>DL31</b>                                                                       |      |              |     |       |
| <b>Protein/peptide digestion (extracytoplasmic)</b>                               |      |              |     |       |
| halolysin (peptidase S8 and S53 subtilisin kexin sedolisin)                       | 1080 | Halar_3678   | 100 | 0.4   |
| aminopeptidase (peptidase family M42)                                             | 745  | Halar_3640   | 100 | 2.7   |
| <b>Amino acid uptake</b>                                                          |      |              |     |       |
| branched-chain amino acid ABC transporter solute-binding protein                  | 158  | Halar_1569   | 100 | 41.1  |
| branched-chain amino acid ABC transporter solute-binding protein                  | 187  | Halar_2890   | 100 | 35.5  |
| branched-chain amino acid ABC transporter solute-binding protein                  | 192  | Halar_3433   | 100 | 35.2  |
| <b>Oligopeptide/dipeptide uptake</b>                                              |      |              |     |       |
| oligopeptide/dipeptide ABC transporter solute-binding protein                     | 9    | Halar_2016   | 100 | 277.4 |
| oligopeptide/dipeptide ABC transporter solute-binding protein                     | 76   | Halar_1439   | 100 | 81.8  |
| oligopeptide/dipeptide ABC transporter solute-binding protein                     | 189  | Halar_0722   | 100 | 35.4  |
| oligopeptide/dipeptide ABC transporter solute-binding protein                     | 255  | Halar_1146   | 100 | 25.7  |

|                                                                                                                    |      |            |     |      |
|--------------------------------------------------------------------------------------------------------------------|------|------------|-----|------|
| oligopeptide/dipeptide ABC transporter solute-binding protein                                                      | 582  | Halar_1285 | 100 | 5.5  |
| oligopeptide/dipeptide ABC transporter solute-binding protein                                                      | 654  | Halar_3436 | 100 | 4.1  |
| oligopeptide/dipeptide ABC transporter solute-binding protein                                                      | 818  | Halar_2651 | 100 | 1.8  |
| oligopeptide/dipeptide ABC transporter solute-binding protein                                                      | 879  | Halar_2024 | 100 | 1.5  |
| <b>Amino acid biosynthesis &amp; degradation</b>                                                                   |      |            |     |      |
| branched chain amino acid aminotransferase (IlvE) → Leu, Val, Ile                                                  | 371  | Halar_2889 | 100 | 13.7 |
| pyrroline-5-carboxylate dehydrogenase (RocA) → Pro                                                                 | 743  | Halar_1051 | 100 | 2.7  |
| 3-isopropylmalate dehydrogenase (LeuB) → Leu                                                                       | 1026 | Halar_2164 | 100 | 0.6  |
| glutamate dehydrogenase (GdhA) ← Glu                                                                               | 378  | Halar_0758 | 100 | 13.3 |
| <b><i>Hrr. lacusprofundi</i></b>                                                                                   |      |            |     |      |
| <b>Amino acid uptake</b>                                                                                           |      |            |     |      |
| branched-chain amino acid ABC transporter solute-binding protein (gene appears to be interrupted by a transposase) | 160  | Hlac_2093  | 100 | 40.5 |
| polar amino acid ABC transporter solute-binding protein                                                            | 891  | Hlac_1804  | 100 | 1.4  |
| <b>Oligopeptide/dipeptide uptake</b>                                                                               |      |            |     |      |
| oligopeptide/dipeptide ABC transporter solute-binding protein                                                      | 71   | Hlac_0069  | 100 | 86.5 |
| oligopeptide/dipeptide ABC transporter solute-binding protein                                                      | 630  | Hlac_0244  | 100 | 4.5  |
| <b>Ammonium uptake &amp; assimilation</b>                                                                          |      |            |     |      |
| glutamine synthetase (GS) (GlnA) → Gln                                                                             | 375  | Hlac_2374  | 100 | 13.5 |
| <b>Amino acid biosynthesis</b>                                                                                     |      |            |     |      |
| histidinol-phosphate aminotransferase (HisC) → His                                                                 | 1017 | Hlac_0235  | 100 | 0.6  |

**Table S7** Proteins involved in motility, taxis and adhesion from the Deep Lake metaproteome with the best matches to *Hht. litchfieldiae*. Protein numbers are given according to Table S3 (ranked by the sum of the normalized total spectrum count). Sequence identity refers to the amino acid sequence identity of the detected protein to its best match (column denoted “Locus tag”) in a BLASTP search. Spectrum count shows the sum of the normalized total spectrum count across all 15 samples.

| Protein annotation                                                                | Protein # | Locus tag    | Sequence identity (%) | Spectrum count |
|-----------------------------------------------------------------------------------|-----------|--------------|-----------------------|----------------|
| <b>Archaea</b>                                                                    |           |              |                       |                |
| archaellin (FlaA or FlaB)                                                         | 1         | halTADL_1544 | 100                   | 695            |
| archaellin (FlaA or FlaB)                                                         | 786       | halTADL_1544 | 75                    | 2.3            |
| archaellin (FlaA or FlaB)                                                         | 3         | halTADL_1812 | 100                   | 497            |
| archaellin (FlaA or FlaB)                                                         | 59        | halTADL_1812 | 77                    | 94             |
| archaellin (FlaA or FlaB)                                                         | 7         | halTADL_1813 | 100                   | 351            |
| archaellin (FlaA or FlaB)                                                         | 12        | halTADL_1813 | 76                    | 239            |
| archaellin (FlaA or FlaB)                                                         | 21        | halTADL_1810 | 100                   | 169            |
| archaellin (FlaA or FlaB)                                                         | 80        | halTADL_1811 | 100                   | 79             |
| archaellin (FlaA or FlaB)                                                         | 118       | halTADL_0078 | 100                   | 52             |
| archaellin (FlaA or FlaB)                                                         | 95        | halTADL_0078 | 75                    | 59             |
| archaellar protein FlaG                                                           | 429       | halTADL_1803 | 100                   | 12             |
| archaellar protein FlaC or FlacD or FlacE                                         | 761       | halTADL_1805 | 100                   | 2.5            |
| <b>Taxis</b>                                                                      |           |              |                       |                |
| bacteriorhodopsin                                                                 | 752       | halTADL_1952 | 100                   | 2.6            |
| methyl-accepting chemotaxis sensory transducer (HtrII) (for sensory rhodopsin II) | 245       | halTADL_3325 | 100                   | 26             |
| globin domain + methyl-accepting chemotaxis sensory transducer                    | 235       | halTADL_0074 | 100                   | 28             |
| heme-based aerotactic transducer HemAT                                            | 351       | halTADL_1627 | 100                   | 15             |
| PBS_HEAT protein; taxis signaling                                                 | 684       | halTADL_1768 | 100                   | 3.4            |
| methyl-accepting chemotaxis sensory transducer with Pas/Pac sensor                | 1093      | halTADL_1218 | 100                   | 0.4            |
| signal transduction protein with CBS domains                                      | 292       | halTADL_1865 | 100                   | 21             |
| chemotaxis signal transduction protein CheW                                       | 473       | halTADL_1838 | 100                   | 8.9            |
| chemotaxis signal transduction protein CheW                                       | 925       | halTADL_1838 | 91                    | 1.2            |
| chemotaxis response regulator CheY                                                | 300       | halTADL_1808 | 100                   | 20             |

|                                                  |      |              |     |     |
|--------------------------------------------------|------|--------------|-----|-----|
| chemotaxis response regulator CheY               | 566  | halTADL_1808 | 94  | 6.0 |
| response regulator receiver protein              | 538  | halTADL_2200 | 100 | 6.9 |
| response regulator receiver protein              | 1036 | halTADL_1816 | 100 | 0.6 |
| response regulator receiver domain + HalX domain | 102  | halTADL_0055 | 96  | 29  |
| KaiC domain                                      | 278  | halTADL_1815 | 100 | 23  |
| KaiC domain                                      | 924  | halTADL_1815 | 94  | 1.2 |

**Table S8** Proteins implicated in protection against and responses to oxidative stress, photolysis and UV irradiation detected in the Deep Lake metaproteome for the haloarchaeal species *Hht. litchfieldiae*, DL31 or *Hrr. lacusprofundi*.

| Proteins                                 | Locus tags                                         | Specific function                                                                                                                                                                                                                                                                                                                                                                                                                             |
|------------------------------------------|----------------------------------------------------|-----------------------------------------------------------------------------------------------------------------------------------------------------------------------------------------------------------------------------------------------------------------------------------------------------------------------------------------------------------------------------------------------------------------------------------------------|
| <b>Oxidative stress</b>                  |                                                    |                                                                                                                                                                                                                                                                                                                                                                                                                                               |
| manganese superoxide dismutase (SOD)     | halTADL_2687, Halar_1640, Hlac_2515                | Degradation of harmful oxygen radicals.                                                                                                                                                                                                                                                                                                                                                                                                       |
| methionine sulfoxide reductase           | halTADL_1172                                       | Reduction of methionine sulfoxide (the oxidized form of methionine, caused by ROS) back to methionine, to reactivate damaged proteins.                                                                                                                                                                                                                                                                                                        |
| thioredoxin                              | halTADL_1187/1756/2077/2563, Halar_3305, Hlac_0372 | Protection of sulfhydryl groups of cysteine residues from forming disulfide linkages under conditions of oxidative stress. Thioredoxin also acts as an electron donor for enzymes such as methionine sulfoxide reductase and peroxiredoxin (Meyer <i>et al.</i> , 2009).                                                                                                                                                                      |
| glutaredoxin                             | halTADL_0399/2104                                  |                                                                                                                                                                                                                                                                                                                                                                                                                                               |
| peroxiredoxin                            | halTADL_0067; Halar_1849                           | Protective antioxidant role via their peroxidase activity against hydrogen peroxide and organic hydroperoxides (Wood <i>et al.</i> , 2003).                                                                                                                                                                                                                                                                                                   |
| Dps ferritins (miniferritins)            | halTADL_1068, Halar_0843/0845, Hlac_0536           | Sequester intracellular iron; these are particularly important when protein turnover releases iron from degraded proteins (Theil <i>et al.</i> , 2007). Fe <sup>2+</sup> reacts with hydrogen peroxide to generate hydroxyl radicals that can damage cellular components, and with O <sub>2</sub> to generate Fe <sup>3+</sup> which precipitates ('rusts') at physiological pH.                                                              |
| universal stress protein (UspA)          | halTADL_0697/1044/1904/2110/2112/2276/2351         | Inferred to protect cells against oxidative damage to DNA (Kvint <i>et al.</i> , 2003; Nachin <i>et al.</i> , 2005).                                                                                                                                                                                                                                                                                                                          |
| RosR transcriptional regulator           | halTADL_0352/1645; Halar_0879                      | Regulates gene expression in response to oxidative stress in, including upregulation of SOD (Sharma <i>et al.</i> , 2012).                                                                                                                                                                                                                                                                                                                    |
| PitA (haloarchaeal hypothetical protein) | halTADL_1349                                       | PitA proteins are so far unique to haloarchaea; although of unknown function, they are inferred to have a function associated with life in hypersaline environments, particularly exposure to limited oxygen availability and ROS neutralization (Bab-Dinitz <i>et al.</i> , 2006; Martinez-Espinosa <i>et al.</i> , 2015).                                                                                                                   |
| <b>Photolysis</b>                        |                                                    |                                                                                                                                                                                                                                                                                                                                                                                                                                               |
| dodecin                                  | halTADL_3198, Halar_2184                           | Small dodecameric flavoprotein that binds riboflavin and protects it from light-induced degradation (Grininger <i>et al.</i> , 2009). Photolytic degradation of riboflavin also leads to toxic derivatives such as lumichrome, which is involved in the generation of cytotoxic singlet oxygen (O <sub>2</sub> <sup>*</sup> ) via transfer of light energy to O <sub>2</sub> (Sikorski <i>et al.</i> , 2001; Grininger <i>et al.</i> , 2009). |



| <b>UV irradiation</b>                                        |                                                                      |                                                                                                                                                                                                                                                                                                                           |
|--------------------------------------------------------------|----------------------------------------------------------------------|---------------------------------------------------------------------------------------------------------------------------------------------------------------------------------------------------------------------------------------------------------------------------------------------------------------------------|
| RadA (Rad51/RecA recombinase homolog)                        | halTADL_1827/2135, Halar_3361, Hlac_2624                             | Catalyzes strand invasion and exchange during homologous recombination, and appears to be critical to the haloarchaeal UV response by permitting rescue of stalled replication forks and/or facilitate recombinational repair (Woods and Dyll-Smith, 1997; McCready <i>et al.</i> , 2005; Boubriak <i>et al.</i> , 2008). |
| RecJ-like exonuclease                                        | halTADL_1000                                                         | Involved in processing stalled forks in UV-damaged DNA, possibly by making DNA lesions at stalled forks accessible for repair (Boubriak <i>et al.</i> , 2008).                                                                                                                                                            |
| topoisomerase VI                                             | halTADL_3021 (subunit B [Top6B])                                     | Involved in processing stalled forks in UV-damaged DNA, possibly by ATP-dependent nicking-closing activity as well as ability to generate double-strand breaks (Boubriak <i>et al.</i> , 2008).                                                                                                                           |
| ribonucleotide reductase (RNR; adenosylcobalamin-dependent)  | halTADL0884                                                          | Catalyzes the rate-limiting step in DNA synthesis from RNA; inferred to have a function in excision repair (McCready <i>et al.</i> , 2005).                                                                                                                                                                               |
| UvrD helicase domain protein                                 | halTADL_2299                                                         | Possibly involved in post-incision events of nucleotide excision repair, as for bacterial UvrD helicase.                                                                                                                                                                                                                  |
| replication protein A (RPA) ssDNA-binding complex components | halTADL_3434/_2569 (RPA32), halTADL_3433 (RPA41), Halar_3463 (RPA32) | RPA-ssDNA complexes are proposed to form during DNA-damage repair pathways in haloarchaea, as for eukaryotic RPA-ssDNA complexes (McCready <i>et al.</i> , 2005).                                                                                                                                                         |

**Table S9** Proteins assigned to *Hht. litchfieldiae* tADL-II. Protein numbers are given according to Table S3 (ranked by the sum of the normalized total spectrum count). Sequence identity refers to the amino acid sequence identity of the detected protein to its best match (column denoted “Locus tag”) in a BLASTP search. Spectrum count shows the sum of the normalized total spectrum count across all 15 samples. Highlighted in purple are tADL-II proteins with a higher spectrum count than the respective tADL protein.

| Protein annotation                                                           | Protein # | Matching tADL locus tag              | Sequence identity (%) | Spectrum count |
|------------------------------------------------------------------------------|-----------|--------------------------------------|-----------------------|----------------|
| <b>Amino acid metabolism</b>                                                 |           |                                      |                       |                |
| 3-isopropylmalate dehydrogenase (LeuB)                                       | 1084      | halTADL_0366                         | 93                    | 0.4            |
| agmatinase (SpeB)                                                            | 374       | halTADL_1131                         | 95                    | 13             |
| glutamate dehydrogenase (GdhA)                                               | 1013      | halTADL_1757                         | 81                    | 0.6            |
| aspartate kinase (LysC)                                                      | 905       | halTADL_1916                         | 90                    | 1.3            |
| D-3-phosphoglycerate dehydrogenase (Ser A)                                   | 236       | halTADL_2045                         | 93                    | 28             |
| phosphoserine phosphatase (SerB)                                             | 309       | halTADL_2046                         | 96                    | 19             |
| anthranilate phosphoribosyltransferase (TrpD)                                | 1049      | halTADL_3066                         | 92                    | 0.6            |
| aspartate aminotransferase (AspB)                                            | 619       | halTADL_3081                         | 97                    | 4.8            |
| glutamine synthetase (GS) (GlnA)                                             | 319       | halTADL_3423                         | 97                    | 18             |
| <b>Carbohydrate metabolism</b>                                               |           |                                      |                       |                |
| alpha-amylase (glycosyl hydrolase, family 13)                                | 193       | halTADL_0142                         | 84                    | 35             |
| glucose-1-phosphate thymidyltransferase (RfbA, RffH)                         | 421       | halTADL_3353                         | 93                    | 11             |
| <b>Cell division</b>                                                         |           |                                      |                       |                |
| cell division protein FtsA                                                   | 467       | halTADL_0130                         | 96                    | 9.2            |
| VCP-like protein (2 x CDC48 domains + 2 x AAA family ATPase domains)         | 927       | halTADL_2740                         | 95                    | 1.2            |
| <b>Cell surface</b>                                                          |           |                                      |                       |                |
| invasin/intimin cell-adhesion domain protein (Sec signal)                    | 577       | No match to tADL – unique to tADL-II | -                     | 5.5            |
| archaellin FlaA or FlaB                                                      | 95        | halTADL_0078                         | 75                    | 59             |
| hypothetical protein (TAT signal)                                            | 490       | halTADL_0878                         | 50                    | 8.3            |
| adhesion pilin (PilA)                                                        | 666       | halTADL_1387                         | 66                    | 3.9            |
| hypothetical protein (Sec signal, PGF-CTERM, C-terminal transmembrane helix) | 126       | halTADL_1403                         | 29                    | 49             |
| archaellin FlaA or FlaB                                                      | 786       | halTADL_1544                         | 75                    | 2.3            |

|                                                                                         |      |              |    |     |
|-----------------------------------------------------------------------------------------|------|--------------|----|-----|
| hypothetical protein (TAT signal)                                                       | 370  | halTADL_1761 | 40 | 14  |
| hypothetical protein (Sec signal, PGF-CTERM, C-terminal transmembrane helix)            | 361  | halTADL_1765 | 76 | 14  |
| archaellin FlaA or FlaB                                                                 | 59   | halTADL_1812 | 77 | 94  |
| archaellin FlaA or FlaB                                                                 | 12   | halTADL_1813 | 76 | 239 |
| <b>Central carbon metabolism</b>                                                        |      |              |    |     |
| pyruvate:ferredoxin oxidoreductase, alpha subunit (PorA)                                | 691  | halTADL_0382 | 93 | 3.4 |
| phosphoenolpyruvate carboxylase (Ppc)                                                   | 572  | halTADL_0401 | 94 | 5.9 |
| fructose-1,6-bisphosphate aldolase, class I (FbaB)                                      | 733  | halTADL_0575 | 92 | 2.8 |
| phosphoglycerate kinase (Pgc)                                                           | 833  | halTADL_0816 | 94 | 1.7 |
| glyceraldehyde-3-phosphate dehydrogenase (NAD(P) <sup>+</sup> -dependent), type I (Gap) | 591  | halTADL_0817 | 90 | 5.2 |
| phosphoenolpyruvate (PEP) synthase (Pps)                                                | 451  | halTADL_1011 | 79 | 9.8 |
| acetate : CoA ligase (Acs)                                                              | 449  | halTADL_1017 | 92 | 9.8 |
| triosephosphate isomerase (TpiA)                                                        | 249  | halTADL_2532 | 89 | 26  |
| enolase (phosphopyruvate hydratase) (Eno)                                               | 391  | halTADL_2780 | 90 | 12  |
| aconitate hydratase (AcnA)                                                              | 401  | halTADL_2902 | 96 | 12  |
| pyruvate kinase (Pyk)                                                                   | 695  | halTADL_3014 | 91 | 3.4 |
| fructose 1,6-bisphosphate aldolase (multifunctional)                                    | 420  | halTADL_3234 | 96 | 11  |
| <b>DNA replication &amp; repair</b>                                                     |      |              |    |     |
| methylated-DNA-[protein]-cysteine S-methyltransferase (Ogt)                             | 1031 | halTADL_0579 | 82 | 0.6 |
| DNA polymerase sliding clamp subunit (PCNA homolog)                                     | 244  | halTADL_1713 | 97 | 27  |
| DNA repair and recombination protein RadA                                               | 284  | halTADL_2135 | 90 | 22  |
| <b>Energy conservation</b>                                                              |      |              |    |     |
| cytochrome c oxidase, subunit II (CoxB)                                                 | 959  | halTADL_1060 | 82 | 0.9 |
| inorganic pyrophosphatase (Ppa)                                                         | 937  | halTADL_1644 | 88 | 1.0 |
| ATP synthase, K subunit (AtpK)                                                          | 293  | halTADL_1940 | 80 | 21  |
| ATP synthase, beta subunit (AtpB)                                                       | 406  | halTADL_1945 | 92 | 12  |
| ferredoxin                                                                              | 42   | halTADL_2137 | 96 | 109 |
| NADPH-dependent F420 reductase                                                          | 1096 | halTADL_2320 | 91 | 0.4 |
| <b>Glycerol metabolism</b>                                                              |      |              |    |     |
| glycerol-3-phosphate dehydrogenase (GlpA)                                               | 327  | halTADL_2244 | 87 | 17  |
| glycerol kinase (GlpK)                                                                  | 381  | halTADL_2249 | 96 | 13  |
| dihydroxyacetone (DHA) kinase, L subunit (DhaL)                                         | 982  | halTADL_2259 | 92 | 0.9 |

|                                                                                |      |              |    |     |
|--------------------------------------------------------------------------------|------|--------------|----|-----|
| dihydroxyacetone (DHA) kinase, K subunit (DhaK)                                | 140  | halTADL_2260 | 94 | 45  |
| <b>Hypothetical</b>                                                            |      |              |    |     |
| hypothetical protein                                                           | 431  | halTADL_0015 | 94 | 10  |
| nucleic acid-binding/OB-fold/TRAM domain protein                               | 267  | halTADL_0109 | 93 | 24  |
| DUF964 / YheA/YmcA domain                                                      | 777  | halTADL_0133 | 88 | 2.4 |
| DUF655 (predicted RNA-binding domain)                                          | 428  | halTADL_0183 | 89 | 10  |
| hypothetical protein                                                           | 887  | halTADL_0395 | 85 | 1.5 |
| predicted RNA-binding protein containing KH domain, possibly ribosomal protein | 1088 | halTADL_0545 | 81 | 0.4 |
| DUF827 / WEB family domain                                                     | 183  | halTADL_0555 | 77 | 36  |
| selT/selW/selH selenoprotein domain / Rdx domain                               | 979  | halTADL_1063 | 81 | 0.9 |
| ThiJ/PfpI domain-containing protein                                            | 199  | halTADL_1769 | 83 | 33  |
| hypothetical protein (DUF4382)                                                 | 215  | halTADL_2062 | 87 | 31  |
| hypothetical protein                                                           | 307  | halTADL_2560 | 89 | 19  |
| hypothetical protein                                                           | 629  | halTADL_2576 | 95 | 4.5 |
| hypothetical protein                                                           | 1100 | halTADL_3036 | 79 | 0.4 |
| nucleic acid binding OB-fold tRNA/helicase-type                                | 150  | halTADL_3218 | 86 | 42  |
| DUF4013 (4 x transmembrane domains)                                            | 727  | halTADL_3238 | 73 | 3.0 |
| <b>Metabolism (other)</b>                                                      |      |              |    |     |
| nucleoside-diphosphate kinase (Ndk)                                            | 641  | halTADL_0169 | 84 | 4.4 |
| orotate phosphoribosyltransferase (PyrE)                                       | 749  | halTADL_0398 | 90 | 2.6 |
| thiamine-phosphate pyrophosphorylase ThiE                                      | 1087 | halTADL_0473 | 74 | 0.4 |
| ribonucleoside-diphosphate reductase, alpha subunit (NrdE)                     | 965  | halTADL_0884 | 91 | 0.9 |
| oxidoreductase FAD-binding domain                                              | 672  | halTADL_1014 | 80 | 3.8 |
| FAD-dependent pyridine nucleotide-disulfide oxidoreductase                     | 650  | halTADL_2528 | 90 | 4.2 |
| rhodanese-like protein                                                         | 258  | halTADL_2750 | 92 | 25  |
| adenine phosphoribosyltransferase (Apt)                                        | 985  | halTADL_2952 | 95 | 0.9 |
| dodecin                                                                        | 238  | halTADL_3198 | 95 | 28  |
| <b>Oxidative stress</b>                                                        |      |              |    |     |
| ferritin Dps family protein                                                    | 20   | halTADL_1068 | 92 | 170 |
| UspA domain-containing protein                                                 | 851  | halTADL_1904 | 76 | 1.6 |
| glutaredoxin                                                                   | 1014 | halTADL_2104 | 94 | 0.6 |
| UspA domain-containing protein                                                 | 910  | halTADL_2276 | 75 | 1.2 |
| thioredoxin                                                                    | 665  | halTADL_2563 | 91 | 3.9 |

|                                            |     |              |    |     |
|--------------------------------------------|-----|--------------|----|-----|
| manganese/iron superoxide dismutase (Sod)  | 164 | halTADL_2687 | 95 | 39  |
| <b>Protein chaperones</b>                  |     |              |    |     |
| group II chaperonin (thermosome)           | 135 | halTADL_0092 | 91 | 45  |
| Hsp20-type chaperone                       | 335 | halTADL_0114 | 93 | 17  |
| peptidylprolyl isomerase FKBP-type         | 77  | halTADL_0251 | 89 | 81  |
| chaperone protein DnaK                     | 212 | halTADL_0595 | 94 | 32  |
| heat shock protein Hsp20                   | 217 | halTADL_0724 | 95 | 31  |
| prefoldin, beta subunit (PfdB)             | 177 | halTADL_1114 | 95 | 37  |
| group II chaperonin (thermosome)           | 19  | halTADL_1928 | 95 | 200 |
| prefoldin, alpha subunit (PfdA)            | 148 | halTADL_2197 | 95 | 43  |
| peptidylprolyl isomerase, cyclophilin type | 152 | halTADL_2273 | 91 | 42  |
| peptidylprolyl isomerase, FKBP-type        | 827 | halTADL_3026 | 90 | 1.8 |
| group II chaperonin (thermosome)           | 6   | halTADL_3279 | 95 | 387 |
| <b>Proteolysis</b>                         |     |              |    |     |
| membrane metalloprotease (peptidase M50 )  | 640 | halTADL_0323 | 79 | 4.4 |
| proteasome alpha subunit (PsmA)            | 50  | halTADL_2681 | 95 | 102 |
| proteasome beta subunit (PsmB)             | 441 | halTADL_2911 | 92 | 10  |
| <b>Ribosomes</b>                           |     |              |    |     |
| ribosomal protein L11                      | 705 | halTADL_0103 | 94 | 3.2 |
| ribosomal protein L1                       | 246 | halTADL_0105 | 99 | 26  |
| acidic ribosomal protein P0-like protein   | 478 | halTADL_0106 | 94 | 8.7 |
| ribosomal protein L7Ae                     | 93  | halTADL_0166 | 98 | 63  |
| ribosomal protein S28e                     | 922 | halTADL_0167 | 95 | 1.2 |
| ribosomal protein S7                       | 304 | halTADL_0623 | 87 | 19  |
| ribosomal protein S6e                      | 612 | halTADL_2119 | 91 | 4.9 |
| ribosomal LX protein                       | 471 | halTADL_2196 | 97 | 9.0 |
| ribosomal protein S4                       | 648 | halTADL_2772 | 93 | 4.2 |
| ribosomal protein L18e                     | 713 | halTADL_2775 | 93 | 3.0 |
| ribosomal protein L13                      | 607 | halTADL_2776 | 96 | 5.0 |
| ribosomal protein S3Ae                     | 592 | halTADL_3142 | 98 | 5.2 |
| ribosomal protein S8e                      | 762 | halTADL_3327 | 89 | 2.5 |
| ribosomal protein L30P                     | 456 | halTADL_3366 | 94 | 9.7 |
| ribosomal protein L32e                     | 268 | halTADL_3370 | 91 | 24  |
| ribosomal protein L6P                      | 834 | halTADL_3371 | 90 | 1.7 |

|                                                                       |      |              |    |     |
|-----------------------------------------------------------------------|------|--------------|----|-----|
| ribosomal protein S8                                                  | 647  | halTADL_3372 | 97 | 4.3 |
| ribosomal protein L5                                                  | 674  | halTADL_3374 | 90 | 3.7 |
| ribosomal protein S4e                                                 | 338  | halTADL_3375 | 90 | 16  |
| ribosomal protein L29                                                 | 194  | halTADL_3380 | 92 | 34  |
| ribosomal protein S19                                                 | 643  | halTADL_3383 | 97 | 4.3 |
| ribosomal protein L23                                                 | 463  | halTADL_3385 | 88 | 9.3 |
| ribosomal protein L4P                                                 | 620  | halTADL_3386 | 89 | 4.8 |
| ribosomal protein L3                                                  | 1001 | halTADL_3387 | 93 | 0.8 |
| <b>Transcription</b>                                                  |      |              |    |     |
| TATA-box-binding protein (Tbp)                                        | 523  | halTADL_0042 | 99 | 7.4 |
| DNA-directed RNA polymerase subunit H (RpoH)                          | 639  | halTADL_0616 | 84 | 4.4 |
| DNA-directed RNA polymerase subunit A (RpoA1)                         | 589  | halTADL_0619 | 96 | 5.3 |
| DNA-directed RNA polymerase subunit A2 (RpoA2)                        | 360  | halTADL_0620 | 93 | 14  |
| TATA-box-binding protein (Tbp)                                        | 966  | halTADL_1732 | 96 | 0.9 |
| DNA-directed RNA polymerase subunit D (RpoD)                          | 499  | halTADL_2774 | 91 | 7.9 |
| DNA-directed RNA polymerase subunit N (RpoN)                          | 842  | halTADL_2778 | 97 | 1.6 |
| <b>Transcriptional regulators</b>                                     |      |              |    |     |
| transcriptional regulator, AsnC family                                | 921  | halTADL_0058 | 93 | 1.2 |
| phosphate uptake regulator, PhoU                                      | 699  | halTADL_1186 | 92 | 3.3 |
| transcriptional regulator, RosR (PadR family)                         | 376  | halTADL_1645 | 92 | 14  |
| transcriptional regulator, XRE family                                 | 926  | halTADL_2533 | 70 | 1.2 |
| phosphate uptake regulator, PhoU                                      | 908  | halTADL_3204 | 93 | 1.3 |
| transcriptional regulator, AsnC family                                | 172  | halTADL_3422 | 96 | 38  |
| <b>Transduction</b>                                                   |      |              |    |     |
| response regulator receiver domain + HalX domain                      | 229  | halTADL_0055 | 96 | 29  |
| response regulator receiver protein                                   | 566  | halTADL_1808 | 94 | 6.0 |
| KaiC domain                                                           | 924  | halTADL_1815 | 94 | 1.2 |
| chemotaxis signal transduction protein CheW                           | 925  | halTADL_1838 | 91 | 1.2 |
| <b>Translation (other)</b>                                            |      |              |    |     |
| translation elongation factor aEF-2 (FusA)                            | 89   | halTADL_0647 | 95 | 66  |
| translation initiation factor 2, alpha subunit (a/eIF2-alpha) (Eif2a) | 1090 | halTADL_0923 | 91 | 0.4 |
| translation initiation factor 2, beta subunit (a/eIF2-beta) (Eif2b)   | 545  | halTADL_2337 | 95 | 6.7 |
| methionyl-tRNA synthetase (MetG)                                      | 611  | halTADL_3069 | 87 | 4.9 |
| elongation factor 1-beta (aEF-1beta) (Ef1b)                           | 454  | halTADL_3453 | 94 | 9.7 |

| <b>Transport</b>                                                     |      |                                         |    |     |
|----------------------------------------------------------------------|------|-----------------------------------------|----|-----|
| phosphate ABC transporter solute-binding protein (PstS)              | 85   | halTADL_1182                            | 51 | 71  |
| ABC-type antimicrobial peptide transport system, permease component  | 693  | halTADL_1613                            | 88 | 3.4 |
| iron ABC transporter solute-binding protein                          | 856  | halTADL_1788                            | 83 | 1.6 |
| carbohydrate ABC transporter solute-binding protein                  | 247  | halTADL_2761                            | 84 | 26  |
| carbohydrate ABC transporter ATPase                                  | 1099 | halTADL_2764                            | 88 | 0.4 |
| branched-chain amino acid ABC transporter solute-binding protein     | 202  | halTADL_2916                            | 88 | 33  |
| K <sup>+</sup> uptake system, TrkA subunit                           | 1048 | halTADL_3061                            | 89 | 0.6 |
| nitrate/sulfonate/bicarbonate ABC transporter solute-binding protein | 697  | No match to tADL –<br>unique to tADL-II | -  | 3.3 |

**Table S10** Variant proteins detected for *Hht. litchfieldiae*, tADL, DL31 and *Hrr. lacusprofundi*. Protein numbers are given according to Table S3 (ranked by the sum of the normalized total spectrum count). Sequence identity refers to the amino acid sequence identity of the detected protein to its best match (column denoted “Locus tag”) in a BLASTP search. Spectrum count shows the sum of the normalized total spectrum count across all 15 samples. SNP denotes variation caused by a single nucleotide polymorphism.

| Protein annotation                                                                | Protein # | Locus tag    | Sequence identity (%) | Spectrum count | Additional notes                   |
|-----------------------------------------------------------------------------------|-----------|--------------|-----------------------|----------------|------------------------------------|
| <b><i>Hht. litchfieldiae</i> - variants</b>                                       |           |              |                       |                |                                    |
| $\alpha$ -amylase (glycosyl hydrolase, family 13)                                 | 543       | halTADL_0142 | 94                    | 6.8            | also detected for tADL and tADL-II |
| adhesion pilin (PilA)                                                             | 750       | halTADL_0751 | 65                    | 2.6            |                                    |
| cell surface glycoprotein (Sec signal, PGF-CTERM, C-terminal transmembrane helix) | 8         | halTADL_1043 | 51                    | 338            |                                    |
| cell surface glycoprotein (Sec signal, PGF-CTERM, C-terminal transmembrane helix) | 18        | halTADL_1043 | 44                    | 205            |                                    |
| cell surface glycoprotein (Sec signal, PGF-CTERM, C-terminal transmembrane helix) | 339       | halTADL_1043 | 50                    | 16             |                                    |
| cell surface glycoprotein (Sec signal, PGF-CTERM, C-terminal transmembrane helix) | 356       | halTADL_1043 | 42                    | 15             |                                    |
| cell surface glycoprotein (Sec signal, PGF-CTERM, C-terminal transmembrane helix) | 618       | halTADL_1043 | 34                    | 4.8            |                                    |
| hypothetical protein (TAT signal)                                                 | 800       | halTADL_1047 | 59                    | 2.1            |                                    |
| SMC domain protein                                                                | 709       | halTADL_1458 | 62                    | 3.1            |                                    |
| phosphate ABC transporter solute-binding protein (PstS)                           | 61        | halTADL_2155 | 88                    | 92             |                                    |
| phosphate ABC transporter solute-binding protein (PstS)                           | 75        | halTADL_2155 | 93                    | 82             |                                    |
| <b>tADL - variants</b>                                                            |           |              |                       |                |                                    |
| phosphate ABC transporter solute-binding protein (PstS)                           | 13        | halTADL_2155 | 99                    | 235            | SNP                                |
| methylated-DNA-[protein]-cysteine S-methyltransferase (Ogt)                       | 273       | halTADL_0579 | 99                    | 24             | SNP                                |
| winged helix-turn-helix DNA-binding domain                                        | 128       | halTADL_0044 | 99                    | 48             | SNP                                |
| hypothetical protein                                                              | 495       | halTADL_2296 | 99                    | 8.0            | SNP                                |
| hypothetical protein (transmembrane helix near N-terminal)                        | 852       | halTADL_2505 | 97                    | 1.6            |                                    |
| ribosomal protein L1                                                              | 78        | halTADL_0105 | 99                    | 81             |                                    |
| methionyl-tRNA synthetase (MetG)                                                  | 325       | halTADL_3069 | 99                    | 17             | SNP                                |



|                                                                                   |     |              |    |     |  |
|-----------------------------------------------------------------------------------|-----|--------------|----|-----|--|
| threonine synthase (ThrC)                                                         | 655 | halTADL_2266 | 97 | 4.0 |  |
| <b>DL31 - variants</b>                                                            |     |              |    |     |  |
| RND superfamily / MMPL (mycobacterial membrane protein large) family protein      | 29  | Halar_1791   | 99 | 134 |  |
| ribosomal protein L29                                                             | 271 | Halar_2474   | 99 | 24  |  |
| cell surface glycoprotein (Sec signal, PGF-CTERM, C-terminal transmembrane helix) | 2   | Halar_0829   | 47 | 629 |  |
| cell surface glycoprotein (Sec signal, PGF-CTERM, C-terminal transmembrane helix) | 36  | Halar_0829   | 45 | 118 |  |
| <b><i>Hrr. lacusprofundi</i> - variants</b>                                       |     |              |    |     |  |
| hypothetical cell surface protein (TAT signal)                                    | 27  | Hlac_0476    | 49 | 138 |  |
| archaellin FlaA or FlaB                                                           | 30  | Hlac_2557    | 38 | 133 |  |
| cell surface glycoprotein (Sec signal, PGF-CTERM, C-terminal transmembrane helix) | 223 | Hlac_2976    | 38 | 30  |  |

**Table S11** Detected proteins with high sequence identity to *Hht. litchfieldiae*, DL31 or *Hrr. lacusprofundi* encoded on contigs with neighbouring genes that best matched to other haloarchaeal species. Protein numbers are given according to Table S3 (ranked by the sum of the normalized total spectrum count). Sequence identity refers to the amino acid sequence identity of the detected protein to its best match (column denoted “Locus tag”) in a BLASTP search. Spectrum count shows the sum of the normalized total spectrum count across all 15 samples. Contig IDs are from the Deep Lake metagenome assemblies (Antarctic Lakes Metagenome: whole\_lake.gbk at <http://genome.jgi.doe.gov/pages/dynamicOrganismDownload.jsf?organism=AntLakMetagenome>).

| Protein annotation                                                                | Protein # | Locus tag    | Sequence identity (%) | Spectrum count | Contig ID     |
|-----------------------------------------------------------------------------------|-----------|--------------|-----------------------|----------------|---------------|
| glycerol kinase (GlpK)                                                            | 191       | halTADL_0681 | 98                    | 35             | 7180000420363 |
| glycerol kinase (GlpK)                                                            | 593       | halTADL_0681 | 98                    | 5.2            | 7180000399115 |
| glycerol kinase (GlpK)                                                            | 586       | halTADL_0681 | 98                    | 5.4            | 7180000397231 |
| transcriptional regulator, AsnC family                                            | 47        | halTADL_1491 | 88                    | 104            | 7180000456564 |
| hypothetical protein (Sec signal, Ig fold domain, C-terminal transmembrane helix) | 163       | halTADL_1042 | 73                    | 39             | 7180000422580 |
| transcriptional regulator, AsnC family                                            | 222       | halTADL_1491 | 80                    | 30             | 7180000396862 |
| adhesion pilin (PilA)                                                             | 358       | halTADL_1885 | 33                    | 15             | 7180000459513 |
| hypothetical protein (transmembrane helix near N-terminal)                        | 708       | halTADL_1615 | 70                    | 3.1            | 7180000398936 |
| nucleic acid binding OB-fold tRNA/helicase-type (RPA32 homolog)                   | 747       | halTADL_3434 | 44                    | 2.6            | 7180000455564 |
| response regulator receiver protein                                               | 759       | halTADL_2696 | 65                    | 2.5            | 7180000268900 |
| FeS assembly protein SufB                                                         | 820       | halTADL_0973 | 95                    | 1.8            | 7180000432870 |
| core histone                                                                      | 903       | halTADL_1708 | 89                    | 1.3            | 7180000446839 |
| winged helix-turn-helix DNA-binding domain                                        | 909       | halTADL_0044 | 62                    | 1.2            | 7180000394553 |
| SecD/SecE/SecDF export membrane protein                                           | 958       | halTADL_0787 | 51                    | 0.9            | 7180000457612 |
| TATA-box-binding protein (Tbp)                                                    | 980       | halTADL_1450 | 93                    | 0.9            | 7180000443701 |
| Hsp20-type chaperone                                                              | 795       | Halar_3162   | 47                    | 2.1            | 7180000457612 |
| adhesion pilin (PilA)                                                             | 839       | Halar_2364   | 39                    | 1.6            | 7180000242587 |
| hypothetical protein (Sec signal; 2 x PKD/chitinase domains)                      | 585       | Hlac_2824    | 34                    | 5.4            | 7180000456692 |
| hypothetical protein: 3 x chitinase/PKD domains, C-terminal transmembrane helix   | 809       | Hlac_2824    | 27                    | 1.9            | 7180000434565 |
| carbohydrate ABC transporter solute-binding protein                               | 870       | Hlac_2862    | 72                    | 1.5            | 7180000267581 |
| VCP-like protein (2 x CDC48 domains + 2 x AAA family ATPase domains)              | 1106      | Hlac_2377    | 67                    | 0.4            | 7180000414114 |

|                         |     |           |    |    |               |
|-------------------------|-----|-----------|----|----|---------------|
| archaellin FlaA or FlaB | 239 | Hlac_2557 | 77 | 28 | 7180000295546 |
|-------------------------|-----|-----------|----|----|---------------|
